# Supplementary material for: Genetic polymorphisms in the C19orf66 gene influenced HIV-1 infection in a Yunnan population
Source: PeerJ. 2023 Sep 7;11:e16005. doi: 10.7717/peerj.16005 (PMC10493081; doi:10.7717/peerj.16005)
Supplement: Supplemental Information 1 [file peerj-11-16005-s001.xlsx]

## Sheet: HIV
sample	Rs77076061	Rs1979262	Rs12611087	age	gender	viral load(Copies/mL)	AST	ALT	TBIL	DBIL	IBIL	TP	ALB	GLOB	WBC	NEUT	LYM	MONO	EO	BASO
1	T T	G G	C C	28	male	174863	19	19	6.4	2	4.4	77	42.5	34.5	7.75	4.93	2.36	0.42	0.02	0.02
2	T T	G G	C C	27	male	80511	24	22	5.7	2	3.7	77.5	39.3	38.2	3.12	1.86	0.74	0.38	0.12	0.02
3	T T	G G	C C	43	male	113	35	28	12.9	3.5	9.4	72.2	34.3	37.9	3.71	2.21	1.13	0.23	0.12	0.02
4	T T	G G	C C	22	male	122867	43	114	9.1	3.3	5.8	80.8	46	34.8	7.03	4.23	2.12	0.48	0.15	0.05
5	T T	G G	C T	30	male	37229	23	17	15.2	5.1	10.1	82.3	47.6	34.7	5.28	2.91	1.78	0.49	0.04	0.06
6	T T	G G	C C	38	male		36	48	10.2	3	7.2	78.8	45	33.8	4.17	2.54	1.26	0.3	0.06	0.01
7	T T	G G	C C	57	female	59300000	44	19	11.9	3.7	8.2	76.2	29.1	47.1	5.39	2.58	2.03	0.22	0.53	0.03
8	T T	G G	C C	24	male	39228	21	11	5.8	2.3	3.5	72.3	41.9	30.4	4.39	2.18	1.84	0.27	0.07	0.03
9	A T	G G	C C	49	male	197603	25	16	8.1	2.5	5.6	70.1	37.7	32.4	2.73	1.4	0.81	0.3	0.2	0.02
10	T T	G G	C T	34	male	151844	21	16	7	3.3	3.7	78.2	37.4	40.8	11.01	6.61	3.26	0.89	0.14	0.11
11	T T	G G	C C	61	female	36800	25	17	12.4	3.3	9.1	77	40.2	36.8	5.06	2.98	1.53	0.38	0.14	0.03
12	T T	G G	C T	32	male	35323
13	T T	G G	C C	62	female		30	16	17.8	3.8	14	86.6	46.1	40.5	7.38	4.17	2.67	0.43	0.07	0.04
14	A T	G G	C C	37	male	99132	40	31	16.1	1.3	14.8	71.3	45.8	25.5	4.02	2.03	1.61	0.33	0.03	0.02
15	T T	G G	C C	61	female	41306	18	17	14.4	4.4	10	81.5	41.7	39.8	8.06	3	4.51	0.47	0.04	0.04
16	T T	G G	C T	66	female	1160000	46	13	7	2.6	4.4	73.3	24.7	48.6	2.88	1.51	0.93	0.39	0.03	0.02
17	T T	G G	C C	28	male
18	T T	G G	C C	47	male	1560000	25	20	8.9	3.7	5.2	73.3	40.1	33.2	3.93	1.82	1.55	0.3	0.2	0.06
19	A T	G G	C C	28	male	104384	18	17	5.3	1.7	3.6	76.3	45.1	31.2	6.85	4.4	1.82	0.42	0.18	0.03
20	T T	A G	C C	25	male	31442	44	66	12.8	4.2	8.6	78.8	44.1	34.7	3.26	1.67	1.21	0.3	0.07	0.01
21	T T	G G	C C	38	male	16620	19	14	11.6	3	8.6	76.1	46.1	30	6.27	3.13	2.34	0.59	0.17	0.04
22	A T	G G	C C	38	male	52385	30	43	7	3.3	3.7	84.9	42.4	42.5	5.61	2.71	1.76	0.55	0.57	0.02
23	T T	G G	C T	35	male	3498	20	12	11.8	3.5	8.3	72.3	40.9	31.4	7.02	3.24	3.06	0.55	0.13	0.04
24	A T	G G	C C	46	female	20436	23	11	10.5	2.9	7.6	77.1	42	35.1	3.97	2.43	1.13	0.33	0.04	0.04
25	A T	G G	C C	50	female	266000	20	15	14.1	4	10.1	63.2	37.8	25.4	3.85	2.62	0.74	0.37	0.09	0.03
26	T T	G G	C C	80	male	55526	45	42	14	4.4	9.6	84.5	41.6	42.9	4.14	1.15	2.34	0.56	0.07	0.02
27	T T	G G	T T	39	female	1440000	22	9	7.8	2.3	5.5	74.4	31.5	42.9	5.87	4.62	0.8	0.33	0.11	0.01
28	T T	G G	C C	27	male	138761	35	26	12.1	3.8	8.3	82.2	39.2	43	8.13	4.62	2.34	0.65	0.47	0.05
29	T T	G G	C C	47	male	154855	30	27	14.5	4.1	10.4	85	43	42	5.1	2.82	1.76	0.42	0.07	0.03
30	A T	G G	C C	46	female	35081	30	29	9	1.9	7.1	76.2	45	31.2	6.72	4.41	1.63	0.45	0.21	0.02
31	T T	G G	C C	43	female	116185	43	34	11.2	3.1	8.1	76.7	38.8	37.9	3.81	1.95	1.05	0.35	0.43	0.03
32	T T	G G	C T	30	male	38502	27	30	20.2	6.5	13.7	76.8	49.9	26.9	5.4	2.93	1.53	0.39	0.53	0.02
33	A T	G G	C C	24	male	18988	23	11	29.9	9.9	20	81	49.3	31.7	6.02	3.66	1.58	0.58	0.16	0.04
34	A T	G G	C C	37	male	1000	66	26	186.9	134.1	52.8	40.6	18.4	22.2	3.26	2.71	0.31	0.23	0	0.01
35	T T	G G	C T	47	female	12500	42	30	7.7	2.1	5.6	78.2	40.1	38.1	4.52	1.99	2	0.44	0.07	0.02
36	T T	G G	C C	41	male	317000	23	20	7	0.8	6.2	53.8	30.5	23.3	3.73	2.86	0.34	0.46	0.05	0.02
37	T T	G G	C C	58	male	11133	16	9	8.7	2.6	6.1	77.7	39.1	38.6	3.78	1.56	1.76	0.37	0.05	0.04
38	T T	G G	C C	43	male	510000	45	39	9.2	3.8	5.4	71.4	36.9	34.5	6.33	4.92	0.76	0.53	0.11	0.01
39	T T	A G	C T	20	female		36	44	10.7	3.3	7.4	74.4	43.4	31	4.25	2.1	1.66	0.4	0.07	0.02
40	T T	G G	C C	41	female	540000	19	18	9.5	2.6	6.9	74.3	39	35.3	10.19	9.3	0.71	0.16	0	0.02
41	T T	G G	C C	57	male		30	26	6.5	1.6	4.9	73.5	41.4	32.1	8.27	3.74	3.42	0.58	0.48	0.05
42	A T	G G	C T	41	female		20	11	15.2	4.7	10.5	77.6	47.2	30.4	3.45	2.22	0.93	0.28	0.01	0.01
43	T T	G G	C C	35	male	82600	22	12	9.7	4.7	5	61.3	35.8	25.5	3.58	3.23	0.18	0.11	0.05	0.01
44	T T	G G	C C	52	male	738200	42	14	3.5	1.4	2.1	74.9	30.7	44.2	3.87	2.17	1.38	0.28	0	0.04
45	T T	G G	C C	25	male	224696	27	64	10.3	3.2	7.1	84.2	55.8	28.4	6	3.45	2	0.47	0.05	0.03
46	A T	G G	C C	56	male	3381	16	12	17.9	4.9	13	72.1	42.5	29.6	4.58	2.45	1.26	0.41	0.44	0.02
47	T T	G G	C C	41	male		84	48	21.3	7.5	13.8	75.9	39.5	36.4	5.21	2.92	1.68	0.45	0.14	0.02
48	T T	G G	C C	64	female	7582	42	34	13.6	4.9	8.7	85.6	42.2	43.4	4	2.15	1.6	0.21	0.02	0.02
49	T T	G G	C C	38	female	9292	18	9	9.2	2.5	6.7	80	45.3	34.7	4.28	2.87	1.07	0.3	0.01	0.03
50	A T	G G	C C	39	male	20006	20	14	14.2	3.5	10.7	80.8	44.9	35.9	5.95	3.45	1.85	0.51	0.11	0.03
51	T T	G G	C C	45	female
52	T T	G G	C C	68	female	105929	23	9	8.9	2.8	6.1	85.2	42.5	42.7	4.74	2.02	2.33	0.32	0.05	0.02
53	T T	G G	C C	62	male	106576	28	23	12.4	3.5	8.9	80.9	47.2	33.7	3.82	2.68	0.74	0.36	0.03	0.01
54	T T	G G	C C	20	female	3043	24	17	14	4.9	9.1	76.1	45.7	30.4	7.66	4.98	1.32	0.78	0.55	0.03
55	T T	G G	C T	56	male	46976	26	26	9.7	3.1	6.6	75.1	47.6	27.5	7.32	1.93	4.63	0.58	0.16	0.02
56	T T	G G	C T	51	female	6333	22	32	12.5	5.3	7.2	76.2	49.5	26.7	3.66	1.96	1.27	0.36	0.06	0.01
57	T T	G G	C T	48	male	6038	25	27	7.6	2.7	4.9	76.5	48	28.5	5.02	2.47	1.93	0.45	0.14	0.03
58	T T	G G	C C	40	male		46	67	9.9	3.7	6.2	83	44.4	38.6	5.08	1.65	2.64	0.63	0.13	0.03
59	T T	G G	C T	26	male		31	22	11.5	3.1	8.4	79.5	47.2	32.3	5.26	2.15	2.31	0.59	0.18	0.03
60	T T	A G	T T	32	male		159	46	11	3.1	7.9	79.8	49.8	30	3.47	2.19	0.94	0.3	0.03	0.01
61	T T	G G	C T	31	male		24	47	12.6	3.4	9.2	80.8	50.2	30.6	5.54	3.02	1.95	0.47	0.05	0.05
62	T T	A G	C T	50	male	3518
63	T T	G G	C C	40	female	235553	27	15	8.4	2.7	5.7	81.9	41.2	40.7	4.64	2.39	1.74	0.43	0.06	0.02
64	T T	A G	C T	25	male	37146	65	69	9	3.6	5.4	71.6	38.4	33.2	5.44	2.25	2.63	0.5	0.01	0.05
65	T T	G G	C C	44	male	10045	21	18	13.7	4.2	9.5	75.3	45.6	29.7	8.43	6.3	1.59	0.52	0.05	0.04
66	T T	G G	C C	40	female	985300	73	60	4.9	1.4	3.5	60.8	27.2	33.6	1.49	0.63	0.59	0.19	0.06	0.02
67	T T	A A	C T	18	female		20	12	10.2	2.8	7.4	73.6	45.3	28.3	4.43	2.92	1.1	0.31	0.09	0.01
68	T T	G G	C C	20	male	106922	21	16	7	2.4	4.6	80.8	51.4	29.4	4.81	2.57	1.77	0.34	0.11	0.02
69	A T	G G	C C	33	male	28074	20	15	44.1	14.4	29.7	85.1	45.4	39.7	4.67	2.01	1.83	0.34	0.43	0.06
70	A T	G G	C T	43	female	614	25	17	18	4.4	13.6	84.4	52.3	32.1	4.49	2.92	1.18	0.28	0.08	0.03
71	T T	G G	C C	35	male	893									5.36	1.66	3.32	0.33	0.03	0.02
72	T T	G G	C C	60	male	4283	30	22	22.7	6.6	16.1	71.4	44.9	26.5	3.17	1.63	1.17	0.35	0.01	0.01
73	T T	G G	T T	44	male	926495	51	33	11.6	5.8	5.8	73.5	34.3	39.2	7.71	4.97	1.75	0.87	0.06	0.06
74	T T	G G	C C	48	female	45360	83	165	15.6	5.3	10.3	76.5	39.6	36.9	3.02	1.52	1.18	0.22	0.07	0.03
75	T T	G G	C C	55	female
76	T T	G G	C C	20	female	142862	25	20	6.9	1.9	5	75.5	47.1	28.4	11.07	8.07	2.28	0.44	0.23	0.05
77	T T	G G	C C	41	male	5108000	19	15	8.8	3	5.8	64.8	32.4	32.4	3.67	2.92	0.52	0.23	0	0
78	T T	G G	C C	29	male	1450000	25	25	21.3	7.1	14.2	82.7	49.8	32.9	4.11	2.62	1.09	0.35	0.04	0.01
79	T T	A G	C T	70	male	37592	35	34	24.5	6.9	17.6	85.3	46.9	38.4	5.65	2.47	2.13	0.75	0.23	0.07
80	A T	G G	C C	41	male	128575									4.86	1.91	2.58	0.31	0.03	0.03
81	T T	G G	C T	48	male	21825	19	13	25.5	9.4	16.1	78.4	43.2	35.2	21.97	20.16	0.99	0.68	0.09	0.05
82	T T	G G	C T	39	female	11811	29	23	8.6	2.5	6.1	82.3	45.1	37.2	4.82	2.92	1.6	0.22	0.05	0.03
83	T T	G G	C C	36	male	18887	42	61	16.3	5	11.3	74.5	50	24.5	4.7	2.76	1.56	0.3	0.07	0.02
84	A T	G G	C C	29	male	26370	18	12	11	3.6	7.4	78.6	47.9	30.7	5.4	2.48	2.32	0.46	0.11	0.03
85	T T	G G	C C	22	male	52320	28	30	16.7	7	9.7	80.7	46.2	34.5	4.11	2.74	1.06	0.28	0.02	0.01
86	T T	G G	C C	46	female	10105	24	20	9.3	2.3	7	86.7	45.3	41.4	3.07	1.72	1.15	0.17	0.02	0.01
87	T T	G G	C C	61	male		27	43	17.3	4.7	12.6	76.4	44.7	31.7	7.56	4.8	1.83	0.69	0.18	0.06
88	T T	G G	C C	34	male	11087	25	13	24.8	7.6	17.2	84.1	51	33.1	4.18	2.84	0.96	0.33	0.02	0.03
89	T T	G G	C C	21	male	425000	48	55	5.8	2.6	3.2	73.5	32.4	41.1	2.83	2.23	0.21	0.22	0.16	0.01
90	T T	G G	C C	37	male		24	37	6.7	2.7	4	70.3	45.7	24.6	7.91	4.14	2.98	0.54	0.21	0.04
91	T T	G G	C C	31	male	76783	24	24	12.8	4.9	7.9	86.7	46.1	40.6	6.93	3.45	2.76	0.7	0	0.02
92	A A	G G	C C	33	male	76283	22	30	11.9	3.6	8.3	77.6	48.9	28.7	4.81	3.03	1.36	0.37	0.02	0.03
93	T T	G G	C T	28	female		14	7	7.6	2.9	4.7	79.3	43.4	35.9	5.85	3.44	1.85	0.48	0.07	0.01
94	T T	G G	C T	59	male	286416	21	19	19.6	6	13.6	75.4	45.8	29.6	7.73	5.22	1.8	0.57	0.08	0.06
95	A T	G G	C C	50	female	89855	35	30	14.1	3.6	10.5	71.3	43	28.3	5.03	3	1.4	0.47	0.12	0.04
96	T T	G G	C C	51	male		54	35	6.8	2.2	4.6	83.4	52.5	30.9	4.33	2.3	1.05	0.92	0.03	0.03
97	T T	G G	C C	67	male	9483	23	12	17.9	7	10.9	84.7	35.5	49.2	8.33	5.49	2.36	0.35	0.09	0.04
99	T T	A G	C T	32	male	46260	21	28	17.3	5.7	11.6	75.8	48.5	27.3	2.76	1.64	0.67	0.27	0.17	0.01
100	T T	G G	C C	27	male	56259	17	13	17.1	5.2	11.9	77.1	48.1	29	5.02	2.57	1.87	0.44	0.1	0.04
101	A T	G G	C C	37	male
102	T T	A G	C T	16	male	3170	20	17	11.2	3.1	8.1	81.6	48.3	33.3	7.93	4.27	2.9	0.71	0.03	0.02
103	T T	G G	C C	26	male	91357	29	44	14.6	4.3	10.3	81.1	47.1	34	6.95	4.54	1.86	0.43	0.09	0.03
104	T T	G G	C C	28	male	34733	25	26	25.2	7	18.2	79.7	52.5	27.2	6.41	3.97	1.91	0.45	0.05	0.03
105	T T	G G	C C	23	female	1180	22	15	21.8	5.9	15.9	76.9	50.9	26	4.42	2.69	1.34	0.32	0.04	0.03
106	T T	G G	C T	24	female	4646	27	18	12.2	3.8	8.4	84.6	45	39.6	4.4	3.39	0.72	0.26	0.01	0.02
107	A T	G G	C T	58	male	4560000	34	33	5.8	3	2.8	60.7	22.4	38.3	3.13	1.34	1.26	0.42	0.09	0.02
108	T T	G G	C C	62	male	199768	17	36	12.6	3	9.6	72.2	41.5	30.7	5.9	3.79	1.35	0.58	0.15	0.03
109	T T	G G	C C	34	male	7786	26	21	20.3	5	15.3	89.1	52.8	36.3	5.5	3.28	1.84	0.32	0.04	0.02
110	T T	A G	C C	42	female	118889	34	31	10	2.9	7.1	84.3	48.4	35.9	3.83	2.37	1.04	0.33	0.07	0.02
114	T T	G G	C C	26	male	38981	21	20	6.5	1.9	4.6	80.8	47.2	33.6	4.94	2.89	1.4	0.61	0.01	0.03
115	T T	G G	C C	48	male		40	42	12.4	3.5	8.9	77.1	42.4	34.7	5.3	2.31	2.31	0.39	0.26	0.03
117	T T	G G	C C	31	male		20	12	11.5	3.3	8.2	78.1	49.2	28.9	4.67	2.39	1.72	0.49	0.04	0.03
118	T T	G G	C C	26	male		21	14	13.1	3.9	9.2	82.1	51.9	30.2	4.32	2.14	1.57	0.53	0.07	0.01
119	T T	G G	C C	22	male		42	49	13.3	3.5	9.8	81	46.3	34.7	5.66	2.82	2.17	0.59	0.05	0.03
120	T T	G G	C C	42	male		33	17	7.8	2.6	5.2	87	40.4	46.6	5.32	2.99	1.85	0.35	0.11	0.02
121	A T	G G	C C	67	male	151900	28	17	13.6	4.8	8.8	76.6	36.5	40.1	3.78	1.72	1.53	0.43	0.05	0.05
122	T T	G G	C T	29	female	1420000	26	33	5.8	1.3	4.5	65	33.1	31.9	4.86	3.4	1.02	0.29	0.12	0.03
123	A T	G G	C T	27	female		21	14	20	6	14	71.3	47.7	23.6	4.11	2.74	0.79	0.5	0.06	0.02
124	T T	G G	C C	30	male	95390	19	11	5.6	2.5	3.1	60.7	35.6	25.1	6.42	5.63	0.29	0.48	0.01	0.01
125	T T	A G	C T	32	male
126	T T	G G	C C	29	male		20	14	11.1	3.9	7.2	75.4	44.7	30.7	3.92	1.84	1.56	0.39	0.11	0.02
127	T T	G G	C C	32	male	57388	22	17	16.2	5	11.2	76	45.3	30.7	8.89	6.55	1.6	0.69	0.02	0.03
128	T T	A G	C T	61	female	26550	24	17	8.5	1.9	6.6	76.5	41.9	34.6	6.53	3.49	2.36	0.55	0.08	0.05
129	T T	G G	C T	33	male
130	A T	G G	C T	35	male
131	A T	G G	C C	51	male		40	47	14.6	5	9.6	85.1	46.1	39
132	T T	G G	C C	48	male	11190	12	6	12.8	3	9.8	72.1	48.8	23.3	5.61	3.89	1.29	0.34	0.05	0.04
133	T T	G G	C C	27	female		15	7	9.4	3.8	5.6	77	41	36	4.22	1.84	1.94	0.4	0.03	0.01
134	T T	G G	C C	32	female	14422	32	32	7.7	2.2	5.5	87.6	41.8	45.8	7.88	3.78	3.37	0.7	0.01	0.02
135	T T	G G	C T	40	female	27479	18	9	7.7	2.1	5.6	74.6	44.3	30.3	5.76	3.74	1.56	0.36	0.08	0.02
136	T T	G G	C C	34	male	78795	21	15	11.6	2.5	9.1	84	41.8	42.2	4.71	2.96	1.35	0.31	0.07	0.02
137	T T	G G	C C	33	male	101547	22	15	21.1	6.1	15	73.6	47.4	26.2	5.88	2.67	2.38	0.66	0.14	0.03
138	T T	G G	C C	45	female	5900	21	11	14.2	3.9	10.3	69.6	40.6	29	3.03	1.78	0.92	0.26	0.02	0.05
139	T T	G G	C C	32	female		11	24	8.1	0.8	7.3	86.3	41.9	44.4	6.69	2.96	3.18	0.44	0.09	0.02
140	T T	A G	C T	69	male
141	T T	G G	C C	33	male	25252
142	A T	G G	C C	63	male	147574	39	24	9.3	3.2	6.1	89.4	43.7	45.7	6.65	4.55	1.72	0.32	0.03	0.03
143	T T	A G	C T	25	male	68591	22	17	15.3	4.9	10.4	81.7	47.6	34.1	5.56	3.51	1.44	0.54	0.03	0.04
144	A T	G G	C C	48	male	12668	21	9	20.1	6.4	13.7	73.4	36.6	36.8	6.4	4.04	1.85	0.37	0.12	0.02
145	A T	G G	C C	47	female	84312	22	10	8.5	2.8	5.7	80	36.7	43.3	2.29	1.4	0.43	0.35	0.11	0
146	T T	A G	C T	49	female	18365	25	19	16.7	4.3	12.4	78.1	45	33.1	4.27	1.4	2.53	0.26	0.05	0.03
147	T T	G G	C C	33	male
148	A T	G G	C C	37	male	99132	22	13	47.7	12.6	35.1	66.4	45.8	20.6	3.33	1.51	1.47	0.33	0.01	0.01
149	T T	G G	C C	41	male	805552			6.8	3	3.8	59.4	22.8	36.6	4.59	2.86	1.27	0.38	0.05	0.03
151	T T	G G	C C	50	female	1888000	53	10	12	5.7	6.3	67.3	22.5	44.8	1.76	1.09	0.45	0.17	0.02	0.03
152	T T	G G	C C	43	male	132098	47	24	7	2.4	4.6	84.1	39	45.1	5.28	2.72	1.99	0.33	0.18	0.03
153	A T	G G	C C	28	male	205698	25	18	10.4	3.5	6.9	92	44.6	47.4	4.28	2.1	1.73	0.39	0.04	0.02
154	T T	G G	C C	55	male	1930000	19	12	12.5	3.9	8.6	50.9	27.6	23.3	10.78	9.38	0.76	0.61	0.01	0.02
155	A T	G G	C C	51	female	2837									8.05	5.5	1.96	0.51	0.05	0.03
156	T T	G G	C T	29	male	35280	25	25	9	2.9	6.1	77.2	42	35.2	6.25	3.39	2.17	0.58	0.1	0.01
157	A T	G G	C C	30	male		24	25	12.3	3.6	8.7	78.8	45.4	33.4	4.96	2.41	1.76	0.36	0.39	0.04
158	T T	G G	C C	21	female		19	9	9.3	2.9	6.4	75	45.9	29.1	3.72	2.24	1.1	0.24	0.13	0.01
159	T T	G G	C C	32	female		26	27	35.8	8.3	27.5	68.6	40.6	28	5.71	3.96	1.39	0.35	0	0.01
160	T T	G G	C T	17	female		19	12	4.5	1.5	3	86.7	39.9	46.8	5.67	3.47	1.64	0.32	0.2	0.04
161	T T	A G	C T	38	female	576942	51	49	4.7	1.6	3.1	85.5	32.8	52.7	3.61	2.7	0.56	0.21	0.13	0.01
162	T T	G G	C C	20	male		22	17	24.3	9.1	15.2	81.5	48.7	32.8	5.28	3.39	1.48	0.33	0.03	0.05
163	T T	G G	C C	33	male		26	23	13.5	3.9	9.6	76	42.8	33.2	3.93	2.2	1.08	0.46	0.17	0.02
164	A T	G G	C C	47	male		32	61	18.3	4.8	13.5	76.2	47.2	29	4.41	2.71	1.25	0.26	0.16	0.03
165	T T	G G	C T	17	male		22	9	18.2	6.5	11.7	80.2	47	33.2	3.6	1.81	1.19	0.4	0.17	0.03
166	T T	G G	C C	56	male	2384000	44	42	10.5	5.6	4.9	78.1	41.8	36.3	3.36	2.27	0.72	0.27	0.09	0.01
167	T T	G G	C C	65	female		32	23	13.3	3	10.3	79.2	42.6	36.6	3.98	1.93	1.58	0.34	0.1	0.03
168	A T	G G	C T	47	female		33	23	15.3	2.4	12.9	77.6	45.3	32.3	3.97	2.1	1.52	0.28	0.05	0.02
169	T T	A A	T T	31	male	1633	22	14	12.8	2.7	10.1	68.6	42.5	26.1	4.18	1.66	1.63	0.52	0.33	0.04
170	T T	A G	C T	26	male		18	13	9	2.9	6.1	75.2	47.9	27.3	7.06	4.2	2.33	0.47	0.02	0.04
171	T T	A G	C T	42	male		20	15	11.2	3	8.2	78.2	47.9	30.3	3.41	2.28	0.75	0.24	0.13	0.01
172	A T	G G	C C	41	male	6038	49	42	4.7	1.9	2.8	76	46.2	29.8	6.82	4.52	1.72	0.48	0.07	0.03
173	T T	G G	C C	35	male		28	31	34	11.2	22.8	91.4	35.5	55.9	5.71	2.52	2.61	0.46	0.07	0.05
174	A T	G G	C C	45	male		27	25	9.6	2.9	6.7	78.4	46.6	31.8	5.18	2.52	2.17	0.42	0.04	0.03
175	T T	A G	C T	29	male
176	T T	G G	C T	42	male		19	11	32.4	10.2	22.2	74.7	46.9	27.8	4.27	2.44	1.17	0.45	0.19	0.02
177	T T	G G	C C	53	male		26	22	7.3	2.3	5	73.1	39.3	33.8	6.42	3.6	2.13	0.56	0.12	0.01
178	T T	G G	C T	45	male		28	19	10.4	3.7	6.7	75.5	37.5	38	4.4	2.43	0.83	0.4	0.34	0.04
179	T T	G G	C T	29	female	1420000	22	10	3	1	2	81.4	39.4	42	4.25	3.37	0.43	0.38	0.04	0.03
180	T T	G G	C C	21	male		25	20	16	4.2	11.8	84.6	51.4	33.2	8.13	5.53	2.08	0.44	0.05	0.03
181	T T	A G	C T	54	male		27	19	9.8	2.8	7	75.8	41.9	33.9	5.35	2.74	2.09	0.46	0.04	0.02
182	T T	G G	C C	46	male		64	41	19.5	6.3	13.2	83.1	44.5	38.6	5.07	2.64	1.77	0.52	0.11	0.03
183	A T	G G	C C	49	male	3962000	51	24	4.6	1.8	2.8	72.8	30.7	42.1	1.81	0.88	0.57	0.26	0.08	0.02
184	T T	G G	C C	29	male	1155									5.89	3.82	1.5	0.46	0.1	0.01
185	T T	G G	C C	54	male		41	63	9.5	2.3	7.2	85.2	45.4	39.8	7.62	4.26	2.64	0.56	0.12	0.04
186	T T	G G	C T	25	male	34063	16	10	9.7	3.4	6.3	79.9	48.9	31	5.49	3.66	1.31	0.46	0.03	0.03
187	T T	G G	C C	40	male		25	29	6.2	1.9	4.3	75.5	45.7	29.8	5.71	4.72	0.55	0.43	0	0.01
188	T T	G G	C T	23	male		23	16	25	7.5	17.5	80.9	49.8	31.1	4.69	1.59	2.59	0.45	0.04	0.02
189	A T	G G	C C	53	male	2220000	23	12	12.3	4.9	7.4	65.8	36	29.8	2.49	1.81	0.34	0.26	0.07	0.01
190	T T	G G	C C	21	female	3043	22	13	11	3.6	7.4	77.2	46.1	31.1	4.26	2.07	1.79	0.35	0.03	0.02
191	T T	A G	C T	46	female	70957	24	25	9.8	3.1	6.7	72.3	44.2	28.1	5.01	3.02	1.42	0.41	0.14	0.02
192	T T	G G	C C	48	male		18	9	18.9	5.3	13.6	83.3	47.2	36.1	8.33	7.02	0.81	0.44	0.04	0.02
193	A T	G G	C C	30	male		23	17	18	5.2	12.8	73	45.6	27.4	7.86	4.77	2.42	0.53	0.09	0.05
194	A T	G G	C T	48	male
195	T T	G G	C T	24	male		19	13	14.5	4.9	9.6	73.3	46.3	27	5.78	3.51	1.67	0.54	0.04	0.02
196	T T	G G	C T	21	male		19	11	9.9	3.9	6	75	49.2	25.8	6.61	5.22	0.76	0.41	0.18	0.04
197	T T	G G	C C	70	male		32	19	13	3.6	9.4	75.7	38.3	37.4	6.24	4.75	0.95	0.43	0.09	0.02
198	T T	G G	C C	28	male		21	16	7.8	3	4.8	74.5	40.6	33.9	6.43	3.44	2.26	0.53	0.12	0.08
199	T T	G G	C C	22	male										6.85	4.96	1.36	0.46	0.02	0.05
200	T T	G G	C C	16	female	5246
201	A T	G G	C C	24	female	8762									4.99	3.49	1.19	0.26	0.02	0.03
202	T T	G G	C C	36	female		42	28	13	3.4	9.6	80.1	43.2	36.9	3.57	0.99	1.86	0.31	0.36	0.05
203	T T	G G	C C	27	male		28	17	15.3	5.1	10.2	74.8	49.4	25.4	6.22	3.6	2.23	0.33	0.02	0.04
204	T T	G G	C T	26	female	13414	16	9	10	2.8	7.2	67.2	41.5	25.7	5.56	3.52	1.67	0.31	0.04	0.02
205	A T	G G	C C	47	male		34	34	22.4	6.2	16.2	79	45.2	33.8	6.4	3.95	1.91	0.48	0.03	0.03
206	T T	G G	C C	58	female	11390000	18	10	9.7	1.5	8.2	78.4	37.5	40.9	6.64	2.97	3.09	0.42	0.13	0.03
207	T T	G G	C C	44	male				11.1	4.1	7	60.1	36.8	23.3	5.93	3.3	2.08	0.46	0.06	0.03
208	T T	G G	C T	17	female		19	12	4.5	1.5	3	86.7	39.9	46.8	5.67	3.47	1.64	0.32	0.2	0.04
209	A T	G G	C C	73	female		17	6	7.1	2	5.1	77.8	34.8	43	4.2	2.73	1.2	0.19	0.04	0.04
210	T T	G G	C C	71	male		27	8	17.7	5	12.7	82.3	42.7	39.6	5.35	2.74	1.84	0.54	0.19	0.04
211	T T	G G	C C	28	male		21	11	14.6	4.9	9.7	84.2	44.1	40.1	3.88	1.65	1.81	0.3	0.08	0.04
212	T T	G G	C C	44	male		40	30	26.2	8.9	17.3	79.4	40.2	39.2	3.2	1.67	1.09	0.41	0.02	0.01
213	T T	G G	C C	30	male		24	21	13.6	4.2	9.4	85.5	44.7	40.8	4.15	1.84	1.84	0.4	0.06	0.01
214	A A	G G	C C	61	male		39	17	15	5.1	9.9	86.9	37.9	49	5.55	4.24	0.61	0.41	0.23	0.06
215	T T	G G	C T	32	female		18	12	16.8	4.5	12.3	57.9	30.6	27.3	9.5	4.85	3.79	0.74	0.08	0.04
216	T T	G G	C C	39	male		23	38	18.5	4.5	14	79.1	48.5	30.6	4.41	2.74	1.15	0.46	0.04	0.02
217	T T	G G	T T	42	male		27	21	14.8	4.4	10.4	77.3	49.6	27.7	3.64	2.28	0.96	0.31	0.08	0.01
218	T T	G G	C C	21	male		17	15	13.7	5.3	8.4	79.7	45.4	34.3	7.31	3.11	3.47	0.52	0.17	0.04
219	T T	G G	C C	60	male		23	22	13.5	3.9	9.6	77.2	45.8	31.4
220	T T	G G	C C	38	male
221	T T	G G	C C	25	female	3616									5.11	2	2.32	0.51	0.26	0.02
222	A T	G G	C C	55	female		32	37	8.9	2.4	6.5	76.9	49.8	27.1	6.59	3.6	2.53	0.38	0.04	0.04
223	T T	G G	C T	40	male	171	32	55	11.5	2.1	9.4	77.9	46.8	31.1	6.73	3.5	2.74	0.39	0.06	0.04
224	T T	G G	C C	54	male	21000000	78	50	14.7	5.9	8.8	82.4	35.9	46.5	2.31	1.56	0.54	0.18	0	0.03
225	T T	G G	C C	56	male		27	21	25.8	7.3	18.5	81.6	44.5	37.1	6.38	2.91	2.99	0.38	0.06	0.04
226	T T	G G	C T	57	female		40	29	17.3	4.3	13	79	43	36	4.66	2.47	1.71	0.35	0.12	0.01
227	T T	G G	C C	33	male		24	14	14.3	4.2	10.1	85.2	46.1	39.1	7.02	4.19	2.2	0.5	0.11	0.02
228	T T	G G	C C	16	female		25	16	14.1	3.7	10.4	80.3	42.5	37.8	5.78	2.87	2.4	0.47	0.02	0.02
229	T T	G G	C C	69	female		22	13	17.5	4.4	13.1	74.2	41.8	32.4	3.55	1.87	1.38	0.24	0.03	0.03
230	T T	G G	C T	32	male	1260000	39	16	9.2	2.9	6.3	26.2	39.7	26.2	4.58	0.65	3.51	0.35	0.01	0.06
231	T T	G G	C C	56	male	6830	24	22	16.1	3.3	12.8	59.3	33.2	26.1	6.6	3.27	2.22	0.95	0.09	0.07
232	A T	G G	C C	34	male		40	34	12.3	3.7	8.6	74.5	47.7	26.8	3.87	2.75	0.61	0.43	0.05	0.03
233	T T	G G	C T	39	male	49	37	41	17.9	5.7	12.2	85.5	47.8	37.7	4.22	3.19	0.78	0.23	0.01	0.01
235	A T	G G	C C	40	male		26	21	6.7	2.4	4.3	53.8	31.6	22.2	2.83	1.49	0.71	0.25	0.32	0.06
236	T T	G G	C T	67	male	4330000	25	15	13.3	3.9	9.4	75.4	41.8	33.6	6.3	4.45	1.16	0.52	0.13	0.04
237	T T	G G	C C	36	female	8336	21	14	8.2	2.5	5.7	76.2	43.5	32.7	5.26	3.47	1.6	0.18	0	0.01
238	T T	G G	C C	36	male		22	14	17.2	5.2	12	79.8	47.6	32.2	4.33	2.45	1.45	0.34	0.07	0.02
240	T T	A G	C C	46	male	337	36	25	4.7	2.1	2.6	67.5	33	34.5	3.32	2.57	0.44	0.29	0.01	0.01
241	T T	G G	C T	43	male		90	32	26.3	10.7	15.6	80.9	43.2	37.7	6.05	3.78	1.62	0.55	0.03	0.07
242	A T	G G	C C	23	female		34	34	7.9	2.1	5.8	71.4	42.1	29.3	3.66	2.37	0.84	0.35	0.08	0.02
243	T T	G G	C C	33	male		22	16	19.5	4.8	14.7	78.2	49.3	28.9	5.12	2.68	1.87	0.43	0.1	0.04
244	T T	G G	C C	57	male		23	14	3.7	0	3.7	63.4	20.3	43.1	5.52	2.93	1.52	1.05	0.02	0
245	T T	G G	C C	41	male		24	21	21.5	6.9	14.6	81.2	46.6	34.6	6.12	4.62	1.15	0.3	0.02	0.03
246	T T	G G	C C	31	male	123	45	38	15	4.1	10.9	78.5	37.2	41.3	6.6	2.99	2.99	0.48	0.07	0.07
248	T T	G G	C C	73	male	22800	21	13	15.3	4.6	10.7	77.3	41.5	35.8	5.74	3.13	2.1	0.33	0.13	0.05
249	T T	G G	C C	26	male		23	13	21.4	6.3	15.1	80.7	42	38.7	5.82	3.58	1.68	0.48	0.06	0.02
250	T T	G G	C C	55	male	18931	45	42	9.3	3.1	6.2	83.1	44.3	38.8	3.68	1.91	1.24	0.33	0.16	0.04
251	T T	G G	C C	78	male		23	14	11.2	3.3	7.8	73.1	44	29.1	4.95	2.65	1.66	0.53	0.1	0.01
252	T T	A G	C T	44	female		35	24	13.7	3.5	10.2	80.2	35.6	44.6	4.51	3.9	0.71	0.39	0.24	0.02
253	T T	G G	C C	46	female	128	77	99	7	1.8	1.2	80.7	43.7	37	5.87	3.01	2.2	0.34	0.26	0.06
254	A T	G G	C C	28	male		30	25	18.65.	5.3	13.3	79.6	47.2	32.4	5.63	1.58	2.99	0.52	0.51	0.03
255	T T	G G	C C	44	male		35	23	9.4	2.2	7.2	76.74	46.5	30.2	6.52	6.64	1.34	0.38	0.12	0.04
256	T T	G G	C T	31	male		27	38	11	2.7	8.3	78.8	49.9	28.9	3.74	1.98	1.44	0.26	0.04	0.02
257	T T	G G	C C	30	female		20	13	7.4	1.9	5.5	79.7	42.9	36.8	6.51	3.28	2.57	0.45	0.17	0.04
258	T T	G G	C C	43	male	2730	3232	54	11	2.8	8.2	76.7	50	26.7	8.03	3.95	3.35	0.52	0.17	0.04
259	T T	G G	C C	47	female	168742	47	26	8.3	3	5.3	86.2	42.2	44	4.99	1.95	2.61	0.35	0.05	0.03
260	A T	G G	C C	39	male		96	94	12.7	4.7	8	77.4	48.6	28.8	5.5	3.09	1.63	0.69	0.08	0.01
261	T T	G G	C C	68	male		32	23	14.9	3.9	11	79.3	44.6	34.7	5.92	2.68	2.65	0.53	0.03	0.03
262	T T	G G	C C	19	male	41675	17	7	13.6	4.7	8.9	72.8	45.7	27.1	4.61	2.69	1.5	0.35	0.06	0.01
263	T T	G G	C C	57	male	458	75	46	9.7	4.7	5	87	33.4	53.6	3.48	1.11	1.65	0.4	0.31	0.01
264	T T	G G	C C	52	male		19	15	10.2	3.5	6.7	68.1	47.2	20.9	3.98	2.29	1.38	0.2	0.07	0.04
265	T T	G G	C C	30	female		20	12	19.6	6.1	13.5	79.2	46.1	33.1	5.16	3.21	1.52	0.39	0.03	0.01
266	A T	G G	C C	61	male
267	T T	A G	C T	66	male		25	12	10.6	2.2	8.4	74.7	45.7	29	5.44	3.93	0.89	0.39	0.16	0.07
268	A T	G G	C T	27	male	5340	21	16	11	2.9	8.1	74.9	49.5	25.4	9.29	5.41	2.42	0.76	0.56	0.14
269	T T	A G	C T	47	male		21	16	14.3	4.4	9.9	68.7	45.3	23.4	4.35	2.76	1.2	0.33	0.04	0.02
270	T T	G G	T T	45	female		23	14	15.5	4.1	11.4	83.5	44.6	38.9	4.6	2.44	1.76	0.33	0.05	0.02
271	A T	G G	C C	20	female	3210	18	11	12.5	3.9	8.6	74.4	45.5	28.9	6.05	3.87	1.58	0.4	0.17	0.03
272	T T	G G	C T	46	male		51	66	18.4	5.7	12.7	84.8	45.3	39.5	7.82	5.96	1.27	0.41	0.14	0.04
273	T T	G G	C C	77	male		23	9	14.2	3.8	10.4	75.8	34.8	41	4.96	1.91	1.76	0.47	0.79	0.03
274	A T	G G	C T	31	male	1700	18	13	12.6	4.6	8	79.6	42.8	36.8	4.8	2.57	1.75	0.39	0.08	0.01
275	T T	A G	C T	49	male		29	36	19.6	6.4	13.2	78	48	30	5.15	2.73	1.78	0.46	0.16	0.02
276	A T	G G	C T	34	female		14	7	8.4	1.4	7	73.9	34.4	39.5	4.29	2.94	0.91	0.38	0.05	0.01
277	A T	G G	C C	77	male		28	25	6.8	1.8	5	73.6	46.3	27.3	6.18	4.06	1.48	0.44	0.16	0.04
278	T T	G G	C C	45	male		25	20	16.5	5.3	11.2	74.7	42	32.7	2.96	1.46	1.13	0.2	0.14	0.03
279	T T	G G	C T	55	male		25	14	24.7	7.5	17.2	72.2	45.3	26.9	5.11	4.09	0.63	0.22	0.15	0.02
280	T T	G G	C C	41	female		22	11	9.3	2.2	7.1	77	41.7	35.3	7.06	3.95	2.36	0.66	0.06	0.03
281	T T	G G	C C	42	female		15	6	8.1	1.9	6.2	71.4	45.3	26.1	3.89	2.19	1.43	0.2	0.06	0.01
282	T T	G G	C C	42	female		24	21	7.9	1.9	6	75.5	45.8	29.7	6.36	4.04	1.8	0.47	0.03	0.02
283	T T	A G	C T	49	male	2736	27	11	14.6	5.1	9.5	73.3	51.4	21.9	6.33	4.96	0.78	0.52	0.06	0.01
284	T T	G G	C C	58	female		19	15	11.1	2.5	8.6	67.1	43.6	23.5	3.11	2.08	0.81	0.17	0.03	0.02
285	T T	G G	C C	31	female		20	12	33.3	7.6	25.7	74.7	49.8	24.9	4.76	3.25	1.15	0.32	0.02	0.02
286	A T	G G	C C	30	male		17	12	10.1	3.3	6.8	77.1	51.3	25.8	5.42	2.64	2.32	0.32	0.11	0.03
287	T T	G G	C C	62	female		28	27	15.4	2.8	12.6	77.8	44	33.8	4.9	2.82	1.66	0.27	0.12	0.03
288	A T	G G	C C	45	male	10100000	19	12	6.5	1.9	4.6	77.1	29.2	47.9	3.42	1.09	1.93	0.38	0	0.02
289	A T	G G	C C	32	male		21	14	14.6	4.2	10.4	71.8	44.5	27.3	5.5	3.16	1.72	0.46	0.12	0.04
290	T T	A G	C T	41	male	222105	29	26	14.3	4.5	9.8	73.5	43.8	29.7	3.2	2	0.85	0.33	0.01	0.01
291	T T	G G	C C	32	female		20	8	16.3	4.7	11.6	70.7	45.8	24.9	5.94	3.87	1.44	0.46	0.12	0.05
292	T T	G G	C C	17	male	2660000	18	59	11.2	4.1	7.1	70.4	32.3	38.1	1.15	0.5	0.49	0.14	0.01	0.01
293	T T	G G	C C	42	male		19	12	7.6	2.2	5.4	96.4	36.6	59.8	3.67	2.11	1.18	0.34	0.02	0.02
294	A T	G G	C C	22	female		25	15	7.2	1.8	5.4	79.4	41.2	38.2	4.05	1.51	2.08	0.27	0.14	0.05
295	T T	G G	C T	27	male	96930	48	67	7.8	2.7	5.1	75.7	48.8	26.9	6.03	4.37	0.92	0.59	0.12	0.03
296	T T	G G	C T	46	male	12333									8.81	6.43	1.59	0.73	0.02	0.04
297	T T	G G	C C	37	male	34397	20	28	6	1.8	4.2	70.1	44.1	26	8.54	6.45	1.63	0.42	0.03	0.01
298	T T	G G	C C	34	male		27	19	10.6	2.5	8.1	78.2	48.5	29.7	5.74	3.34	1.81	0.54	0.02	0.03
299	T T	G G	C C	63	female	3005	24	12	12.8	4.3	8.5	78.3	45.8	32.5	9.04	5.33	3.05	0.56	0.07	0.03
300	T T	A G	C T	49	male		23	15	13.8	4.7	9.1	79.8	45.1	34.7	5	2.8	1.66	0.49	0.04	0.01
301	T T	G G	C C	48	female		25	17	11.4	3	8.4	79	43.3	35.7	5.82	3.47	1.94	0.34	0.04	0.03
302	A T	G G	C C	23	male		26	41	6.7	2.6	4.1	64.6	38.3	26.3	5.72	3.21	1.85	0.51	0.11	0.04
303	T T	G G	C C	24	male		27	25	11.6	3.7	7.9	74	48.5	25.5	7.8	4.46	1.79	0.61	0.15	0.07
304	T T	G G	C T	24	male	36206	27	24	23.9	6.8	17.1	81.2	48.6	32.6	5.2	2.63	2.04	0.45	0.06	0.02
305	A T	G G	C T	70	male		25	21	12.2	2.9	9.3	82.7	45.2	37.5	8.65	6.11	1.51	0.82	0.17	0.04
306	A T	G G	C C	25	male	29838	22	20	10.9	4	6.9	77.4	50	27.4	6.53	5.03	0.89	0.42	0.18	0.01
307	T T	G G	C C	16	male		21	12	11.3	4.5	6.8	77.7	46.2	31.5	3.47	1.61	1.36	0.34	0.13	0.03
308	T T	G G	C C	34	male	15200000	72	50	6	3.3	2.7	85.2	42.3	42.9	7.26	4.42	1.53	0.68	0.54	0.09
309	T T	G G	T T	30	male	3195	34	32	22.2	6.1	16.1	79.9	46.4	33.5	4.24	2.41	1.4	0.4	0.02	0.01
310	T T	G G	C C	43	male		29	28	11.6	3.6	8	80.6	43.3	37.3	3.87	1.87	1.4	0.35	0.2	0.05
311	T T	G G	C T	24	female
312	T T	G G	C C	21	male		34	85	22.3	6.7	15.6	73.8	49.7	24.1	4.89	2.21	2.18	0.44	0.03	0.03
313	A T	G G	C C	53	female	2133	28	19	8.2	1.7	6.5	64.2	42.8	21.8	5.68	3.52	1.72	0.3	0.1	0.04
314	A T	G G	C C	62	male	41115	24	20	27.2	6.9	20.3	82.7	46.6	36.1	8.82	2.55	2.59	0.46	0.18	0.04
315	T T	G G	T T	31	female	3764948	156	109	5.4	1.9	3.5	82.2	37.3	44.9	5.25	2.63	2.14	0.43	0.02	0.03
316	T T	G G	C T	66	male	9730	33	27	21.5	7.6	13.9	78.9	43.7	35.2	6.23	3.69	1.81	0.68	0.04	0.01
317	T T	G G	C C	29	male	1880000	42	66	11.6	3.4	8.2	78.7	38.7	40	5.48	3.04	1.34	0.77	0.29	0.04
318	T T	G G	C C	43	female	70846	18	9	12.4	4	8.4	63	41.9	51.1	3.85	2.49	0.89	0.41	0.05	0.01
319	T T	G G	C T	48	male		25	32	13.3	3.4	9.9	77.2	48.1	29.1
321	A T	A G	C T	29	male
322	T T	A G	C T	33	male	219000	137	40	16.2	8.8	7.4	72.8	31.1	41.7
323	A T	G G	C C	65	male	3620	54	22	16.6	4	12.6	73.7	34.1	39.6	3.94	1.54	2.08	0.3	0.01	0.01
324	T T	G G	C C	51	male	125175	30	34	7.7	2.8	4.9	75.1	42.8	32.3	5.13	2.56	1.9	0.55	0.1	0.02
325	T T	G G	C C	28	male	99662	26	17	16.3	3.7	12.6	81.3	46.2	35.1	9.95	6.23	3.03	0.58	0.06	0.05
326	T T	G G	C T	40	male		28	46	19.2	3.5	15.7	81.1	50.2	30.9	8.63	4.87	3.16	0.49	0.07	0.04
327	T T	G G	C C	33	male	3113	25	17	18	5.7	12.3	66.6	44.8	21.8	3.27	1.41	1.53	0.27	0.04	0.02
328	T T	G G	C C	37	female		55	53	6.5	2.2	4.3	70.6	44.8	25.8
329	T T	G G	C C	35	female		24	27	9	2.3	6.7	76.4	40.8	35.6	4.62	3.41	0.81	0.33	0.03	0.01
330	T T	A G	C T	39	male		26	29	12.6	3.2	9.4	76.8	47.9	28.9	4.81	1.85	2.08	0.39	0.46	0.03
331	T T	G G	C T	42	male	39936	28	30	8.6	2.3	6.3	78.2	50.3	27.9	7.24	4.1	2.68	0.4	0.02	0.04
332	T T	A G	C T	38	female	97668	19	13	10.8	3.6	7.2	82.6	41.9	40.7	3.66	2.82	0.48	0.28	0.07	0.01
333	A T	G G	C C	39	male	50785	44	26	11.1	3.6	7.5	69.3	45	24.3	3.06	1.21	1.26	0.48	0.08	0.03
334	A T	G G	C C	26	male	54049	58	90	16.9	4.9	12	74.8	48.5	26.3	5.1	3.76	0.88	0.38	0.05	0.03
335	T T	G G	C C	42	male	29335	27	17	10.7	2.8	7.9	79.7	36.9	42.8	5.32	1.88	2.96	0.34	0.1	0.04
336	A T	G G	C C	32	male	995	19	14	19.6	4.5	15.1	74.6	48.7	25.9	8.57	6.45	1.66	0.38	0.03	0.05
337	T T	G G	C C	46	male		23	16	14.1	5.1	9	80.6	41.5	39.1	3.9	2.6	0.93	0.35	0	0.02
338	T T	G G	C T	49	male		20	17	13.3	3.8	9.5	66.2	44.1	22.1	5.09	2.47	2.01	0.38	0.2	0.03
339	T T	G G	C C	24	female	7989	20	16	6.9	1.6	5.3	72.5	40.7	31.8	7.64	4.78	2.4	0.41	0.04	0.01
340	T T	A G	C T	63	female	764	28	15	12.5	3.7	8.8	76.3	39.7	36.6	5.52	2.91	2.01	0.52	0.07	0.01
341	T T	G G	C C	41	female	65490	115	166	13.8	3.4	10.4	72.2	38.4	33.8	4.32	2.63	1.33	0.31	0.04	0.01
342	A T	A G	C T	33	female	36199	26	20	9.9	2.3	7.6	87.6	42.2	45.4	3.94	1.53	2.02	0.33	0.05	0.01
343	A T	G G	C C	50	male	71000	24	14	7.6	2.2	5.4	65.8	35.2	30.6	4.17	1.67	1.75	0.71	0.03	0.01
344	T T	G G	C C	23	male	68000	18	13	5.5	1.8	3.7	84.3	44.3	40	5.14	3.21	1.05	0.7	0.15	0.03
345	T T	G G	C C	26	male	32063	16	8	10.8	3	7.8	83.8	45.9	37.9	5.62	3.5	1.6	0.45	0.05	0.02
346	T T	A G	C T	46	male		34	51	9.1	2.9	6.2	75	49	26	5.62	3.01	2.09	0.44	0.07	0.01
347	T T	G G	C C	45	male		22	8	15.4	4.8	10.6	73.9	45.1	28.8	4.03	2.21	1.41	0.37	0.01	0.03
348	A T	G G	C C	26	male	53645	33	26	18.9	5.3	13.6	72.6	44.9	27.7	4.58	2.25	1.9	0.35	0.05	0.03
349	T T	A G	C T	43	male	369425	238	57	52	32.5	19.5	94.2	23.8	70.4	5.36	3.22	1.55	0.43	0.16	0.01
350	T T	G G	C C	68	female	348314	21	20	6.3	1.8	4.5	78.2	42.2	36	7.84	3.71	2.85	0.66	0.55	0.07
352	T T	A G	C T	58	male	38378	27	28	14.5	4.2	10.3	77	44.6	32.4	5.07	2.67	1.86	0.48	0.03	0.03
353	T T	G G	C C	58	female	6160	15	10	16.8	6.4	10.4	80	46.8	33.2	3.66	3.16	2.04	0.45	0	0.01
354	T T	G G	C C	37	male	2580000	34	29	7.8	3.6	4.2	81.2	43.8	37.4	4.54	1.9	1.57	0.31	0.73	0.03
355	T T	G G	T T	38	male	24600000	29	10	4.7	2.6	2.1	43.2	21.4	21.8	2.16	1.47	0.35	0.29	0.04	0.01
356	T T	G G	C C	35	female	1056000	117	50	23	14.3	8.7	75.6	25.7	49.9	9.2	7.32	1.23	0.52	0.08	0.05
357	T T	G G	C C	21	female	7960	18	8	13.1	3.9	9.2	72.7	44.3	28.4	7.08	3.76	2.81	0.35	0.11	0.05
358	A T	G G	C C	29	male	10225	23	18	13	4.3	8.7	71.3	45.1	26.2	7.22	4.21	2.27	0.55	0.15	0.04
359	T T	G G	C C	52	male	529182	32	41	13.9	5.2	8.7	70.2	42.8	27.4	4.43	2.32	1.55	0.48	0.05	0.03
360	T T	G G	C T	72	male		49	52	18	6	12	85.2	47.8	37.4	5.3	3.15	1.75	0.3	0.07	0.03
361	A T	G G	C C	69	female	629673	31	18	13.9	4.5	9.4	75.9	43.1	32.8	5.22	2.79	1.99	0.4	0.02	0.02
363	T T	G G	C T	32	male		22	22	15.6	4.3	11.3	70.7	46.4	24.3
365	A T	G G	C C	65	male		27	17	11.3	2.5	8.8	56	28.1	27.9	4.65	2.14	2.03	0.41	0.02	0.05
366	T T	G G	C C	37	male		26	17	10.4	4.5	5.9	79.1	44.1	35	4.84	2.56	1.98	0.29	0	0.01
367	T T	G G	C C	66	male		21	10	12.3	4.2	8.1	79	38.2	40.8	4.67	2.65	1.43	0.3	0.26	0.03
368	T T	G G	C C	44	female	8730	32	43	17.4	7.6	9.8	80.5	36.9	43.6	1.93	1.07	0.62	0.18	0.05	0.01
369	T T	G G	C C	35	male	21780	42	60	27.2	6.9	20.3	76.9	48.5	28.4	6.8	3.2	2.77	0.5	0.27	0.06
370	T T	G G	C C	31	female	395000	19	15	17.9	4.8	13.1	76.8	48.3	28.5	5.42	3.33	1.62	0.44	0.02	0.01
371	A T	G G	C C	32	male	223000	27	33	13.5	3.7	9.8	70.7	45.8	24.9	4.7	2.31	1.75	0.49	0.14	0.01
372	T T	G G	C C	23	male		18	8	14.4	4.6	9.8	76.2	51.5	24.7	5.82	3.36	1.93	0.33	0.15	0.05
373	T T	G G	C T	25	male	331	62	97	13.8	5.1	8.7	72.9	46.1	26.8	5.78	2.42	2.42	0.36	0.52	0.06
374	T T	A G	T T	21	male		40	59	11.8	4.4	7.4	77	47.2	29.8	3.63	4.52	1.82	0.23	0.05	0.01
375	T T	G G	C C	47	male		35	41	14.2	6.1	8.1	78	52.4	25.6	4.65	3.36	0.86	0.28	0.13	0.02
376	T T	G G	C C	25	male	209000	23	32	15.7	4.3	11.4	76.6	50.7	25.9	7.36	5.67	1.13	0.45	0.08	0.03
377	T T	G G	C C	41	male	750000	22	13	9.5	4.4	5.1	83.1	41.9	41.2	3.56	2.26	0.72	0.39	0.17	0.02
378	T T	A G	C T	32	female
379	T T	G G	C C	47	female	4840	29	25	10.8	3.2	7.6	82.8	46.4	36.4	3.74	1.38	2.1	0.23	0.02	0.01
380	T T	G G	C C	50	male	116000	24	26	12.7	2.3	10.4	78.5	51.7	26.8	5.83	3.44	1.9	0.37	0.09	0.03
381	T T	G G	C C	31	female	17200	32	24	13.4	3.1	10.3	78.2	50.8	27.4	5.17	3.92	0.96	0.24	0.03	0.02
382	T T	G G	T T	16	male	11100	32	22	7.9	2.6	5.3	73.4	49.6	23.8	5.5	2.74	1.89	0.74	0.11	0.02
383	T T	A G	T T	25	male	40600	22	25	27.9	8.8	19.1	69.2	48.4	20.8	5.1	1.78	2.68	0.53	0.08	0.03
384	T T	G G	C C	56	male	581000	29	40	14.9	4.5	10.4	84.8	44.9	39.9	6.49	2.86	2.96	0.47	0.17	0.03
385	T T	G G	C T	29	male	324000	25	30	9.8	2.9	6.9	84.8	47.5	37.3	9.6	7.19	1.62	0.49	0.26	0.04
386	T T	A G	C T	36	male	138000	25	16	11.6	3.3	8.3	76.8	46.8	30	4.39	2.95	0.92	0.4	0.08	0.04
387	A T	G G	C C	25	male	136000	25	24	7.3	3	4.3	79.9	47.9	32	8	6.51	1.06	0.39	0.01	0.03
388	T T	A G	C T	79	male	10300	39	15	19.8	6.9	12.9	77	42.1	34.9	8.82	5.89	1.61	0.69	0.59	0.04
389	A T	G G	C C	42	female	261000	39	38	23.4	6.1	17.3	78.3	42.2	36.1	3.95	2.16	1.52	0.25	0.01	0.01
390	T T	G G	C T	52	male		21	29	12.7	4.3	8.4	65.2	46.5	18.7	4.66	3.21	0.97	0.44	0.03	0.01
391	T T	G G	C C	29	male		39	58	7.2	2.6	4.6	76.5	50.4	26.1	6.2	4.3	1.25	0.48	0.13	0.04
392	T T	G G	C C		male		21	18	13.5	3.9	9.6	75.2	48.5	26.7	4.34	1.92	2.1	0.25	0.05	0.02
393	T T	G G	C C	55	female	223	32	24	7.1	2.1	5	69.9	47.5	22.4	3.57	1.99	1.27	0.24	0.03	0.04
394	T T	G G	C C	30	female	65200	21	17	17.9	5.6	12.3	81.8	51	30.8	6.35	4.71	1.06	0.36	0.18	0.04
395	T T	A G	C T	25	male	283000	23	21	12.9	4.5	8.4	83.2	49.4	33.8	4.71	2.19	1.96	0.51	0.04	0.01
396	A T	G G	C C	27	male	42400	19	17	15.2	6.2	9	83.3	43.4	39.9	4.03	1.68	1.97	0.33	0.04	0.01
397	T T	A G	C T	22	male	2290000	19	15	12.4	3.7	8.7	79.6	53.1	26.5
398	T T	G G	C C		male
399	T T	G G	C C	55	female		23	21	14.5	3.6	10.9	71.7	44.5	27.2	5.18	2.89	1.88	0.3	0.08	0.03
400	A T	G G	C C	33	male		32	28	9.4	3.4	6	72.2	45.3	26.9	7.99	5.47	1.89	0.57	0	0.06
401	T T	G G	C C	65	female	72600	26	19	31.2	6.8	24.4	69.8	45.8	24	3.77	1.69	1.79	0.27	0.01	0.01
402	T T	G G	C C	34	male	207	36	28	10.3	2.1	8.2	81	49.1	34.9	5.45	2.87	1.89	0.58	0.08	0.03
403	T T	G G	C T	55	male		34	50	12.3	3.4	8.9	71.3	45.5	25.8	11.09	6.88	3.5	0.56	0.09	0.06
404	T T	G G	C C	35	female	11800	20	10	13.1	3.4	9.7	79	48.5	30.5	5.9	3.17	1.84	0.42	0.41	0.06
405	T T	G G	T T	49	male	213000	44	47	14.4	6.6	7.8	77.7	47.9	29.8	6.18	4.1	1.53	0.37	0.15	0.03
406	T T	G G	C C	62	female	659000	20	25	16	4.8	11.2	68.9	32.9	36	4.75	2.71	1.18	0.64	0.18	0.04
407	A T	G G	C C	27	female	6248	44	59	8.2	2.6	5.6	74.6	44.9	29.7	4.1	2.91	0.95	0.19	0.03	0.02
408	T T	G G	C T	22	male		22	20	6.5	3	3.5	78	52.5	25.5	5.88	3.37	1.99	0.35	0.16	0.01
409	T T	G G	C C	34	male		42	23	12.1	3.8	8.3	70.4	48.9	21.5	5.64	3.34	1.93	0.3	0.05	0.02
410	T T	G G	C T	45	male	2800	19	19	17.3	5.2	12.1	70	45.2	24.8	7.36	4.35	2.4	0.41	0.14	0.06
411	A T	G G	C C	21	male	2660000	44	44	7.3	2.9	4.4	82.3	40.8	41.5	4.54	2.14	2	0.24	0.15	0.01
412	A T	G G	C C	45	male	513000	25	22	27.8	6.6	21.2	70.1	47	23.1	6.55	3.98	1.9	0.56	0.08	0.03
413	T T	G G	C C	25	male	1280	33	89	21	6.1	14.9	75.8	51.6	24.2	7.46	4.01	2.59	0.59	0.23	0.04
414	T T	G G	C C	23	male	1580	29	31	10.2	3.9	6.3	73.5	47.4	26.1	4.65	2.52	1.7	0.4	0.01	0.02
415	T T	G G	C C	33	male	328000	35	43	15.9	4.6	11.3	73.2	38.5	34.7	7.14	5.72	1.01	0.37	0.03	0.01
416	T T	G G	C C	43	female	132000	18	12	13.8	4.8	9	71.9	47.9	24	3.56	2.01	1.27	0.23	0.02	0.03
417	T T	G G	C C	54	male	432000	30	12	15.1	4.5	10.6	73.6	45	28.6	4.63	3.42	0.84	0.28	0.06	0.03
418	A T	G G	C C	34	male		35	64	5.6	2	3.6	71.9	48.4	23.5	6.19	4.26	1.25	0.4	0.25	0.03
419	A T	G G	C T	40	male	9690	28	43	13.1	4.2	8.9	81	45	36	3.92	2.16	1.19	0.29	0.19	0.09
420	T T	G G	T T	32	male	160000	22	27	16.6	5.5	11.1	86.6	45.8	40.8	4.88	1.92	2.54	0.36	0.03	0.03
421	T T	G G	C C	57	male		25	19	13.3	3.4	9.9	82.2	46.6	35.6	6.56	4.7	1.34	0.48	0.02	0.02
422	T T	G G	C C	44	male	433000	54	56	7.5	3.7	3.8	60	33.9	26.1	3.06	2.38	0.4	0.26	0.02	0
423	T T	G G	C C	29	female		21	22	10	2.9	7.1	88.9	54.9	34	6.32	4.27	1.43	0.42	0.14	0.06
424	T T	G G	C T	33	male	31700	24	26	10.5	3.5	7	80.9	45.5	35.4	5.26	3.5	1.33	0.4	0.02	0.01
425	A T	A G	C T	69	male	2250
426	T T	G G	C C	22	male	538000	32	18	39.3	10.7	28.6	79.1	49.1	30	8.15	4.69	2.47	0.8	0.13	0.06
427	T T	G G	C C	36	male	8880	18	22	7.9	2.4	5.5	78.4	48.4	30	6.01	4.45	0.92	0.51	0.11	0.02
428	T T	A G	C C	24	female	300000	22	7	8.3	2.5	5.8	69.2	44.2	25	5.09	2.98	1.67	0.39	0.04	0.01
429	T T	A G	C T	34	male	90300	32	22	7.5	3.3	4.2	67.7	34.6	33.1	6.17	1.85	1.91	0.95	1.39	0.04
430	T T	G G	C T	20	female	9080000	19	12	8.4	2.3	6.1	81.7	49.2	32.5	8.07	5.88	1.75	0.39	0.04	0.01
433	T T	G G	C T	60	female		21	13	17.8	4.4	13.4	73.1	42.9	30.2	5.29	3.67	1.19	0.33	0.05	0.05
434	T T	G G	C C	28	female	124000	18	7	20.2	5.6	14.6	80.7	49.2	31.5	6.45	4.54	1.58	0.28	0.03	0.02
435	T T	G G	C T	84	female		29	24	5.2	1.2	4	72.5	41.5	31	4.26	2.26	1.72	0.24	0.03	0.01
437	T T	G G	C T	61	male		29	32	38	9.4	28.6	76.1	49.9	26.2	8.62	5.21	2.61	0.63	0.12	0.05

## Sheet: controls
sample	Rs77076061	Rs1979262	Rs12611087	gender	age	AST	ALT	TBIL	DBIL	IBIL	TP	ALB	GLOB	WBC	NEUT	LYM	MONO	EO	BASO
1	T T	G G	C T	male	88	34	30	5.2	2.8	2.4	80	44	36	7.55	5.23	1.76	0.44	0.10	0.02
3	T T	G G	C C	male	64	21	13	10.9	4.9	6.0	73	45	28	4.04	2.29	1.30	0.40	0.04	0.01
5	A T	G G	C C	male	79	30	28	11.5	5.1	6.4	75	47	28	4.73	2.93	1.43	0.28	0.06	0.03
6	T T	G G	C C	female	76	16	13	10.6	5.4	5.2	77	46	31	5.46	3.09	1.89	0.38	0.08	0.02
7	T T	A G	C C	female	40	17	7	6.1	3.1	3.0	71	43	28	6.32	3.59	2.32	0.23	0.13	0.05
8	T T	A G	C T	female	38	19	16	9.8	5.5	4.3	73	43	30	5.25	2.56	2.26	0.28	0.12	0.03
9	T T	G G	C C	female	67	33	28	8.4	3.5	4.9	76	44	32	7.48	4.74	2.20	0.30	0.20	0.04
10	A T	G G	C C	male	73	23	14	11.4	5.4	6.0	79	44	35	6.69	2.90	3.08	0.58	0.10	0.03
11	T T	G G	C T	male	63	20	15	37.7	16.1	21.6	72	44	28	5.30	3.12	1.58	0.36	0.19	0.05
12	T T	G G	C C	male	40	32	78	10.10	5.1	5.8	77	47	30	8.05	4.45	2.64	0.42	0.47	0.07
13	T T	G G	C C	male	45	19	18	11.0	3.7	7.3	76	46	30	6.08	3.46	2.06	0.47	0.05	0.04
14	T T	G G	C C	male	36	22	34	5.5	2.5	3.0	83	48	35	7.70	4.11	2.87	0.58	0.10	0.04
15	A T	G G	C C	male	75	21	11	7.9	4.3	3.6	81	37	44	5.74	3.84	1.38	0.42	0.08	0.02
16	T T	A G	C C	male	53	25	25	7.7	4.2	3.5	77	47	30	5.08	2.03	2.57	0.40	0.05	0.03
18	A T	G G	C C	male	49	21	19	4.5	1.5	3.0	79	44	35	8.08	4.13	2.50	0.92	0.51	0.02
20	T T	G G	C C	male	38	19	19	1.8	1.6	0.2	67	45	22	9.41	4.72	3.89	0.52	0.21	0.07
21	T T	G G	C C	female	31	18	9	9.0	5.0	4.0	78	48	30	7.37	4.31	2.53	0.48	0.03	0.02
22	T T	A G	C C	female	31	19	9	5.4	3.0	2.4	78	45	33	6.16	3.16	2.47	0.43	0.08	0.02
23	T T	G G	C C	female	46	16	14	9.0	4.0	5.0	77	46	31	5.59	3.53	1.69	0.22	0.11	0.04
24	T T	A G	T T	male	45	35	58	11.6	2.7	8.9	79	49	30	8.31	3.58	3.98	0.42	0.25	0.08
25	T T	A G	C T	male	45	21	25	9.2	3.7	5.5	78	46	32	12.42	8.52	2.73	0.70	0.43	0.04
26	T T	G G	C T	male	34	24	27	11.5	4.6	6.9	89	51	38	9.53	4.69	3.90	0.65	0.25	0.04
27	A T	G G	C C	female	45	14	8	8.0	4.4	3.6	74	46	28	4.89	3.30	1.27	0.27	0。03	0.02
29	T T	G G	C C	male	80	21	15	7.0	3.6	3.4	74	43	31	5.40	3.88	1.10	0.31	0.10	0.01
30	T T	G G	C C	female	22	19	13	5.2	3.2	2.0	79	48	31	6.98	4.50	2.04	0.36	0.05	0.03
33	A T	G G	C C	female	65	23	13	15.0	5.7	9.3	72	42	30	4.52	2.55	1.46	0.27	0.21	0.03
34	T T	G G	C C	male	82	20	10	6.6	3.6	3.0	74	44	30	6.40	3.37	2.08	0.50	0.40	0。05
35	T T	G G	C C	male	62	32	40	12.3	5.4	6.9	78	45	33	6.48	2.58	3.31	0.56	0.02	0.01
36	T T	A A	T T	female	60	23	22	4.6	2.9	1.7	88	45	43	7.33	5.14	1.73	0.45	0.00	0.01
37	T T	G G	C C	female	22	38	70	8.1	3.8	4.3	80	46	34	6.82	3.41	2.84	0.43	0.11	0.03
40	A T	G G	C C	male	47	26	27	12.8	6.1	6.7	79	48	31	7.01	4.09	2.14	0.69	0.07	0.02
41	T T	G G	C C	male	35	24	41	17.3	5.8	11.5	93	50	43	8.59	3.83	3.92	0.44	0.37	0.03
42	T T	A G	C T	male	55	24	24	7.4	2.6	4.8	75	44	31	7.67	4.70	2.37	0.45	0.12	0.03
43	T T	A G	C C	male	54	27	27	4.5	3.2	1.3	71	41	30	6.08	3.40	2.0	0.42	0.24	0.02
44	T T	G G	C C	female	43	20	12	19.4	7.7	11.7	77	48	29	6.25	3.75	2.22	0.24	0.02	0.02
45	T T	G G	C T	male	31	49	98	11.1	5.0	6.1	78	49	29	7.89	4.39	2.53	0.64	0.25	0.08
48	T T	G G	C C	male	31	69	128	16.8	7.6	9.2	78	48	30	6.55	4.31	1.80	0.35	0.05	0.04
49	T T	G G	C C	female	77	18	16	9.8	3.9	5.9	75	42	33	4.60	2.28	1.90	0.34	0.05	0.03
50	T T	G G	C C	male	60	20	22	5.5	4.0	1.5	77	47	30	5.50	3.87	1.18	0.47	0.03	0.01
51	T T	G G	C C	male	35	27	56	6.5	3.4	3.1	78	48	30	7.01	2.91	3.39	0.51	0.16	0.04
52	T T	G G	C C	male	40	23	24	9.1	5.0	4.1	81	51	30	6.50	3.09	2.68	0.44	0.27	0.08
54	T T	G G	C C	female	34	26	13	5.9	3.3	2.6	80	47	33	4.77	3.13	1.42	0.18	0.03	0.01
55	T T	G G	C C	male	48	29	26	31.3	11.0	20.3	81	45	36	4.49	2.41	1.54	0.27	0.20	0.07
56	T T	G G	C C	male	30	60	134	6.0	3.2	2.8	74	48	26	6.53	2.85	3.00	0.50	0.15	0.03
57	T T	G G	C C	male	50	28	26	7.8	3.5	4.3	74	43	31	7.80	4.23	3.03	0.40	0.11	0.03
58	T T	G G	C T	male	30	25	24	18.0	7.1	10.9	78	49	29	6.03	3.18	2.50	0.29	0.03	0.03
61	T T	A G	C C	male	30	16	9	18.1	6.9	11.2	75	48	27	4.92	2.92	1.58	0.31	0.08	0.03
63	T T	G G	C C	male	51	27	34	7.8	4.3	3.5	84	50	34	7.12	3.95	2.63	0.32	0.16	0.06
64	T T	G G	C C	male	48	25	30	7.5	3.2	4.2	70	45	25	6.21	3.78	1.98	0.33	0.09	0.03
66	T T	G G	C T	female	23	14	7	11.8	5.4	6.4	80	49	31	6.91	4.88	1.41	0.49	0.09	0.04
67	T T	A G	C C	female	33	21	19	11.5	4.5	7.0	80	49	31	7.80	5.35	2.00	0.36	0.07	0.02
68	T T	G G	C T	female	31	19	8	11.3	6.6	4.7	80	48	32	6.20	4.07	1.73	0.35	0.03	0.02
70	T T	G G	C T	male	22	23	29	23.0	9.9	13.1	80	52	28	5.05	2.69	1.91	0.34	0.07	0.04
71	T T	A G	C C	female	45	22	11	8.8	3.4	5.4	79	48	31	5.10	2.82	2.02	0.20	0.04	0.02
72	T T	G G	C C	male	63	37	37	6.8	3.5	3.3	79	48	31	5.79	2.97	2.18	0.46	0.15	0.03
73	A T	G G	C C	female	42	16	7	7.5	3.6	3.9	77	46	31	5.06	2.96	1.58	0.48	0.02	0.02
74	T T	G G	C C	male	54	21	23	24.4	9.5	14.9	74	47	27	7.64	4.64	2.38	0.44	0.16	0.02
75	T T	A G	T T	male	65	27	16	13.1	5.2	7.9	81	43	38	7.37	4.94	1.64	0.63	0.12	0.04
76	T T	A G	T T	male	62	26	29	4.6	2.6	2.0	81	48	33	8.58	4.33	3.52	0.60	0.10	0.03
77	T T	G G	C T	male	79	17	13	11.7	4.7	7.0	76	45	31	9.56	5.10	3.67	0.44	0.30	0.05
78	T T	G G	C C	male	76	24	18	-12.9	5.2		90	47	43	7.60	3.42	3.65	0.42	0.07	0.04
79	T T	G G	C C	female	68	29	29	8.1	3.1	5.0	83	45	38	7.24	3.54	2.97	0.32	0.38	0.03
80	T T	G G	C C	female	68	23	17	11.1	3.4	7.7	87	47	40	8.62	5.85	2.03	0.52	0.20	0.02
81	A T	G G	C C	female	81	31	34	16.8	7.7	9.1	79	46	33	7.19	4.06	2.32	0.51	0.23	0.07
82	T T	A G	C T	male	42	86	118	6.2	3.4	2.8	82	48	34	5.45	2.75	1.94	0.58	0.17	0.01
83	T T	A G	C T	male	48	21	31	10.1	3.8	6.3	76	49	27	6.39	3.29	2.41	0.48	0.17	0.04
84	T T	G G	C T	female	45	16	12	3.7	2.3	1.4	77	44	33	5.80	3.48	1.93	0.27	0.06	0.06
85	A T	A G	C T	female	43	48	77	6.7	2.6	4.1	78	44	34	4.33	2.07	1.81	0.37	0.07	0.01
86	T T	G G	C C	male	38	25	23	14.4	6.0	8.4	83	50	33	7.49	4.51	2.36	0.51	0.09	0.01
87	T T	G G	C C	female	78	25	10	6.6	3.4	3.2	75	41	34	4.94	2.96	1.66	0.20	0.03	0.03
89	T T	A G	C T	male	42	28	26	9.6	3.7	5.9	78	46	32	6.05	3.21	2.34	0.40	0.07	0.03
90	T T	G G	C T	male	85	21	14	7.5	3.0	4.5	72	43	29	5.93	3.86	1.23	0.64	0.17	0.03
91	T T	G G	C C	male	50	30	34	6.1	2.6	3.5	76	45	31	8.61	4.04	3.13	0.73	0.06	0.05
92	T T	G G	C C	male	40	28	37	7.0	3.5	3.5	80	49	31	7.88	4.08	3.04	0.50	0.22	0.04
93	T T	G G	C C	male	60	28	23	7.7	3.9	3.8	79	45	34	5.44	2.96	1.98	0.33	0.15	0.02
94	T T	G G	C C	male	42	23	16	15.4	5.4	10.0	79	46	33	4.77	2.88	1.43	0.37	0.07	0.02
95	A A	G G	C C	male	42	21	26	8.4	3.8	4.6	75	46	29	5.45	2.92	2.02	0.39	0.07	0.03
96	T T	G G	C C	female	34	17	9	12.4	5.9	6.5	79	46	33	6.01	3.34	2.07	0.31	0.22	0.07
97	A T	G G	C C	female	28	17	21	5.3	1.7	3.6	73	44	29	5.81	2.57	2.70	0.34	0.17	0.03
100	A T	G G	C T	male	48	31	65	5.5	3.3	2.2	70	44	26	8.02	5.15	2.02	0.51	0.31	0.03
101	A A	G G	C C	male	24	16	27	7.2	3.8	3.4	69	44	25	7.09	1.84	3.09	0.82	0.25	0.09
102	T T	G G	C C	male	45	16	12	7.8	3.3	4.5	75	45	30	6.05	3.10	2.66	0.23	0.04	0.02
104	A T	G G	C C	female	49	22	24	11.0	3.8	7.2	76	46	30	5.34	2.79	2.11	0.30	0.10	0.04
107	T T	G G	C C	male	35	24	37	9.0	3.5	5.5	76	46	30	5.78	3.28	1.93	0.38	0.16	0.03
110	A T	G G	C C	male	25	24	47	16.6	2.0	14.6	86	52	34	7.22	4.11	2.47	0.49	0.11	0.04
115	T T	G G	C C	male	59	29	30	10.6	4.2	6.4	81	45	36	5.26	3.26	1.49	0.03	0.14	0.04
116	T T	G G	C C	male	42	20	44	11.6	4.2	7.4	74	49	25	7.14	3.62	2.90	0.46	0.13	0.03
118	T T	G G	C C	female	54	21	19	11.6	4.8	6.8	74	44	30	4.28	1.79	2.14	0.23	0.09	0.03
119	A T	G G	C C	male	39	28	27	9.5	5.0	4.5	77	46	31	4.44	1.99	1.96	0.41	0.05	0.03
123	T T	G G	C T	male	32	16	14	5.1	2.6	2.5	84	49	35	4.62	2.11	1.89	0.44	0.16	0.02
124	T T	G G	C C	male	33	30	57	10.9	4.2	6.7	80	48	32	4.81	2.46	1.81	0.29	0.22	0.03
126	T T	A G	C T	male	33	27	39	8.2	4.4	3.8	75	46	29	5.60	3.54	1.46	0.39	0.20	0.01
129	T T	G G	C T	female	57	29	26	8.4	4.1	4.3	75	44	31	5.91	3.46	1.97	0.36	0.08	0.04
132	T T	G G	C C	female	34	19	15	3.8	1.9	1.9	84	47	37	8.28	5.37	2.32	0.40	0.17	0.02
136	T T	G G	C C	female	31	24	29	7.4	3.5	3.9	75	48	27	5.61	2.87	2.35	0.27	0.08	0.04
138	T T	G G	C C	female	47	17	13	10.8	4.2	6.6	76	45	31	5.36	3.48	1.44	0.36	0.08	0.00
140	T T	G G	C T	female	32	15	9	17.2	6.8	10.4	79	47	32	7.34	4.13	2.66	0.45	0.08	0.02
142	T T	G G	C C	female	44	30	31	11.0	5.1	5.9	82	47	35	5.54	2.76	2.24	0.40	0.11	0.03
143	T T	G G	C C	female	38	23	13	11.1	4.4	6.7	81	45	36	6.03	3.92	1.76	0.29	0.05	0.01
144	T T	G G	C C	male	34	15	17	6.8	3.1	3.7	81	48	33	7.76	4.74	2.36	0.45	0.15	0.06
146	T T	G G	C C	male	38	22	14	32.3	15.0	17.3	79	46	33	5.20	2.83	1.95	0.35	0.06	0.01
147	T T	G G	C C	male	36	28	56	18.0	7.1	10.9	81	48	33	7.89	4.76	2.53	0.51	0.07	0.02
148	A T	G G	C C	male	32	32	59	25.2	9.7	15.5	86	52	34	5.71	3.41	1.57	0.38	0.32	0.03
149	T T	G G	C C	female	32	26	19	9.0	3.3	5.7	87	50	37	7.15	4.01	2.64	0.44	0.04	0.02
154	T T	G G	C C	female	31	17	16	8.5	4.0	4.5	77	47	30	4.90	2.86	1.63	0.29	0.10	0.02
155	T T	G G	C T	male	32	19	27	13.6	6.7	6.9	75	48	27	4.55	3.09	1.04	0.25	0.15	0.02
157	T T	A A	T T	male	24	30	36	27.1	11.4	15.7	87	50	37	10.41	6.63	3.10	0.49	0.16	0.03
158	T T	G G	C T	female	34									4.63	2.53	1.80	0.28	0.01	0.01
159	T T	G G	C C	female	37	18	14	9.9	5.4	4.5	69	39	30	4.33	2.34	1.45	0.27	0.25	0.02
160	T T	G G	C C	female	30	17	8	9.4	4.3	5.1	82	47	35	5.93	3.15	2.08	0.39	0.24	0.07
161	A T	G G	C C	female	27	18	14	8.5	4.2	4.3	78	44	34	4.10	2.42	1.27	0.32	0.08	0.01
162	T T	A G	T T	female	22	20	10	10.6	5.1	5.5	79	50	29	5.96	3.96	1.53	0.33	0.11	0.03
165	T T	A G	C T	male	36	21	14	5.1	2.6	2.5	74	44	30	5.51	2.93	1.94	0.19	0.39	0.06
167	T T	G G	C C	female	35	19	15	6.1	2.9	3.2	80	47	33	5.78	3.90	1.62	0.19	0.05	0.02
168	T T	G G	C C	male	25	46	60	28.7	9.8	18.0	90	48	42	9.34	6.56	2.02	0.61	0.13	0.02
169	A T	G G	C T	male	50	25	26	9.4	4.0	5.4	77	43	34	5.86	3.73	1.73	0.34	0.03	0.03
173	T T	G G	C C	male	24	18	20	6.0	3.0	3.0	77	47	30	5.95	3.89	1.49	0.42	0.05	0.10
174	T T	G G	C C	male	27	25	30	14.6	6.5	8.1	76	49	27	6.23	3.46	2.23	0.34	0.18	0.02
175	T T	G G	C C	female	39	19	14	5.1	2.9	2.2	75	43	32	6.65	3.56	2.50	0.29	0.24	0.06
176	T T	G G	C C	male	28	19	21	10.0	4.3	5.7	74	46	28	5.70	2.56	2.33	0.43	0.36	0.02
177	A T	G G	C C	female	39	34	41	4.4	1.9	2.5	83	45	38	7.69	4.78	2.24	0.42	0.20	0.05
178	T T	A G	C T	female	37	20	7	7.7	2.9	4.8	79	46	33	8.35	4.51	3.02	0.62	0.16	0.14
179	T T	G G	C T	female	50	26	18	5.6	2.5	3.1	79	43	36	4.17	1.88	1.96	0.28	0.03	0.02
181	T T	G G	C C	male	32	21	30	6.0	3.0	3.0	75	46	29	6.94	3.96	2.29	0.45	0.19	0.05
182	T T	G G	C C	female	37	17	14	12.3	5.0	7.3	79	78	31	5.63	3.48	1.86	0.26	0.02	0.01
183	T T	A G	C T	female	39	20	14	7.9	3.5	4.4	86	47	39	4.67	2.87	1.40	0.33	0.05	0.02
185	A T	G G	C T	male	52	24	22	6.7	3.1	3.6	74	46	28	6.97	7.48	1.83	0.41	0.22	0.03
190	A T	G G	C C	male	39	19	16	10.6	5.2	5.4	76	41	35	5.94	3.91	1.42	0.42	0.15	0.04
191	T T	G G	C C	male	45	18	12	10.1	3.5	6.6	76	46	30	6.73	3.71	2.38	0.43	0.14	0.07
192	T T	G G	C C	male	40	28	30	7.0	3.4	3.6	83	47	36	8.17	4.53	3.20	0.36	0.05	0.03
193	T T	G G	C C	male	41	33	54	10.8	5.2	5.6	77	47	30	7.02	4.09	2.27	0.45	0.15	0.06
194	T T	G G	C C	male	30	20	18	19.9	8.3	11.6	68	46	22	6.02	3.14	2.18	0.54	0.10	0.06
195	T T	G G	C C	male	22	27	34	3.6	2.2	1.4	86	51	35	6.42	3.21	2.66	0.42	0.11	0.02
196	A T	G G	C C	male	44	42	64	7.8	2.6	5.2	81	50	31	3.89	1.33	2.05	0.40	0.09	0.02
197	T T	G G	C C	male	42	26	36	7.7	3.2	4.5	77	46	31	7.45	4.43	2.24	0.53	0.23	0.02
198	T T	G G	C C	male	39	24	16	8.3	3.7	4.6	78	48	30	4.74	3.09	1.34	0.24	0.04	0.03
199	A T	G G	C C	male	43	22	48	6.8	3.1	3.7	82	48	34	6.34	3.23	2.59	0.38	0.11	0.03
200	T T	G G	C T	male	25	24	24	9.4	4.0	5.4	80	48	32	5.54	3.39	1.78	0.25	0.08	0.04
201	T T	G G	C C	male	46	50	63	9.6	3.4	6.2	73	45	28	9.37	5.00	3.47	0.47	0.11	0.05
202	T T	G G	C C	female	27	18	9	18.2	5.8	12.4	83	50	33	5.70	3.34	1.97	0.33	0.04	0.02
204	A T	G G	C C	male	33	21	25	9.3	2.4	6.9	87	49	38	7.76	4.78	2.04	0.74	0.15	0.05
205	T T	G G	C C	male	71	22	20	15.9	5.1	10.8	71	44	27	6.83	4.11	1.93	0.52	0.25	0.02
206	T T	G G	C C	male	43	31	34	18.1	5.1	13.0	78	48	30	5.20	2.95	1.78	0.41	0.05	0.01
207	T T	G G	C C	female	44	30	32	7.2	1.7	5.5	74	46	28	5.77	3.32	2.07	0.28	0.06	0.04
208	T T	G G	C C	female	37	23	18	7.7	2.0	5.7	81	46	35	7.35	3.91	2.79	0.38	0.25	0.02
209	T T	G G	C C	male	37	19	14	12.4	2.9	9.5	78	44	34	5.01	2.83	1.74	0.34	0.05	0.05
212	T T	G G	C C	female	47	37	42	5.3	1.1	4.2	76	44	32	5.16	2.84	1.94	0.26	0.09	0.03
214	T T	A G	C T	male	53	22	23	58	12.1	2.8	75	44	31	4.44	2.09	1.82	0.39	0.11	0.03
217	T T	G G	C C	female	39	15	11	11.8	2.6	9.2	76	46	30	6.02	4.29	1.34	0.33	0.05	0.01
219	T T	G G	C C	female	49	21	28	9.5	1.9	7.6	73	43	30	6.22	4.35	1.34	0.36	0.13	0.04
222	T T	G G	C C	female	45	19	14	5.3	1.5	3.8	80	44	36	4.94	2.94	1.69	0.17	0.13	0.01
223	T T	G G	C T	female	43	16	10	7.4	1.9	5.5	84	47	37	8.67	5.10	2.89	0.48	0.14	0.06
225	T T	G G	C C	male	32	26	37	11.3	2.3	9.0	75	46	29	7.19	3.92	2.48	0.62	0.14	0.03
226	T T	G G	C C	female	49	20	12	8.3	2.4	5.9	78	48	30	6.03	3.83	1.73	039	0.05	0.03
227	T T	G G	C C	male	30	22	18	16.3	5.8	10.5	78	49	29	5.83	3.60	1.78	0.34	0.10	0.01
228	A T	G G	C C	female	40	19	9	17.5	4.5	13.0	82	50	32	5.82	3.39	2.08	0.28	0.04	0.03
229	T T	G G	C C	female	47	21	12	8.9	2.1	6.8	82	44	38	7.68	4.29	2.86	0.41	0.08	0.04
232	T T	G G	C C	male	34	19	9	9.4	2.9	6.5	70	42	28	5.05	2.26	2.02	0.40	0.30	0.07
233	T T	G G	C C	male	33	19	20	11.2	3.5	7.7	70	45	25	5.25	2.63	2.05	0.24	0.23	0.10
234	T T	G G	C C	male	35	24	45	9.3	2.2	7.1	77	48	29	5.95	3.16	2.22	0.39	0.13	0.05
235	T T	G G	C C	female	41	23	23	16.8	4.6	12.2	80	44	36	6.61	3.30	2.81	0.40	0.07	0.03
236	T T	G G	C T	female	38	19	13	14.5	4.4	10.1	72	44	28	4.37	2.27	1.60	0.25	0.18	0.07
237	T T	G G	C T	female	34	16	12	10.2	2.9	7.3	82	50	32	4.80	2.40	2.05	0.27	0.06	0.02
238	T T	G G	C T	male	42	19	31	7.2	2.5	4.7	76	46	30	7.72	3.73	3.23	0.48	0.23	0.05
240	T T	G G	C C	male	50	21	9	9.5	2.9	6.6	72	42	30	8.36	5.93	1.68	0.46	0.24	0.05
241	T T	G G	C C	female	48	22	20	17.8	4.7	13.1	79	46	33	4.28	2.57	1.27	0.28	0.12	0.04
242	A T	G G	C C	male	48	23	33	13.6	3.6	10.0	78	48	30	6.05	2.96	2.60	0.43	0.04	0.02
243	T T	G G	C T	female	26	15	10	24.9	7.9	16.7	76	45	31	9.16	6.49	2.07	0.54	0.04	0.02
244	A T	G G	C C	male	56	26	42	9.1	1.7	7.4	73	45	28	5.45	3.23	1.61	0.47	0.11	0.03
245	T T	G G	C C	female	51	20	28	12.2	2.7	9.5	74	45	29	6.27	3.82	1.87	0.26	0.30	0.02
247	T T	G G	C C	male	43	29	47	16.7	4.0	12.7	80	47	33	8.05	4.89	2.45	0.44	0.24	0.03
249	T T	G G	C C	male	51	65	51	14.4	2.9	11.5	78	44	34	7.87	5.03	1.98	0.65	0.14	0.07
250	T T	G G	C T	female	52	22	18	8.6	2.3	6.3	78	45	33	5.59	2.32	2.73	0.31	0.18	0.05
251	A T	G G	C C	female	30	11	8	6.8	1.4	5.4	67	39	28	8.59	6.33	1.79	0.36	0.10	0.01
257	T T	G G	C C	female	46	22	25	17.8	5.4	12.4	80	46	34	7.18	4.38	8.35	0.37	0.05	0.03
258	A T	G G	C C	male	58	44	62	17.3	4.8	12.5	76	47	29	6.26	4.06	1.68	0.36	0.14	0.02
259	T T	G G	C C	male	31	20	29	11.7	3.1	8.6	77	46	31	6.19	3.36	2.12	0.47	0.19	0.05
260	A T	G G	C T	female	29	17	13	12.0	3.2	8.8	74	44	30	6.77	4.80	1.54	0.34	0.08	0.01
261	T T	G G	C C	female	34	20	15	8.5	8.2	6.3	82	46	36	4.22	1.64	1.99	0.47	0.11	0.01
262	T T	G G	C C	male	40	27	20	11.4	2.8	8.6	78	44	34	10.99	7.17	2.99	0.61	0.17	0.05
264	A T	G G	C T	female	48	22	14	15.3	2.3	13.0	83	49	34	3.44	1.91	1.27	0.17	0.05	0.01
265	T T	G G	C C	male	47	22	21	15.6	3.0	12.6	75	45	30	6.12	3.87	1.84	032	0.07	0.02
266	T T	G G	C C	female	44	28	21	8.4	1.6	6.8	72	44	28	3.84	1.93	1.38	0.36	0.13	0.04
267	T T	G G	C C	male	36	24	21	6.6	1.7	4.9	78	49	29	6.36	2.60	3.24	0.27	0.23	0.02
268	T T	G G	C C	male	37	21	18	14.0	4.3	9.7	77	48	29	8.50	4.66	3.16	0.56	0.06	0.06
269	T T	G G	C C	male	34	19	15	7.8	2.4	5.4	79	47	32	6.88	3.65	2.59	0.45	0.12	0.07
273	T T	G G	C C	female	47	24	15	6.5	1.1	5.4	77	47	30	6.36	3.57	2.37	0.33	0.07	0.02
276	T T	G G	C C	female	41	17	14	10.3	2.4	7.9	80	47	33	6.57	3.47	2.66	0.35	0.07	0.02
278	T T	G G	C T	male	43	28	40	15.1	4.6	10.5	81	48	33	7.16	4.13	2.27	0.63	0.10	0.03
280	T T	G G	C C	male	45	19	20	4.6	1.6	3.0	74	45	29	9.81	6.92	2.08	0.53	0.14	0.04
281	A T	G G	C C	male	42	17	29	9.3	2.6	6.7	72	45	27	7.20	4.13	2.08	0.47	0.48	0.04
282	T T	G G	C C	female	32	19	15	8.5	2.3	6.2	83	46	37	4.70	1.84	2.47	0.29	0.08	0.02
283	A T	G G	C C	female	47	19	14	6.7	1.7	5.0	77	47	30	6.06	4.02	1.49	0.37	0.12	0.06
286	T T	G G	C C	male	36	21	26	25.8	6.2	19.6	77	46	31	5.38	3.18	1.75	0.38	0.04	0.03
289	T T	G G	C C	male	43	27	43	17.5	6.1	11.4	69	45	24	6.82	3.60	2.70	0.44	0.07	0.01
290	T T	G G	C C	male	33	22	11	13.4	4.9	8.5	82	48	34	5.76	2.64	2.63	0.35	0.12	0.02
291	T T	G G	C C	male	34	22	34	7.4	2.4	5.0	76	46	30	5.80	3.13	2.10	0.47	0.08	0.02
292	T T	G G	C T	female	30	13	8	16.5	5.5	11.0	75	46	29	7.02	4.77	1.82	0.30	0.10	0.03
293	T T	G G	C T	male	46	27	29	13.4	3.4	10.0	73	45	28	7.19	4.58	1.82	0.50	0.25	0.04
297	T T	G G	C C	female	35	17	13	21.7	5.6	16.1	77	46	31	4.19	2.26	1.62	0.21	0.06	0.04
298	T T	G G	C C	male	30	14	13	9.7	3.6	6.1	76	46	30	7.42	3.78	2.67	0.74	0.17	0.06
301	T T	G G	C T	male	35	29	42	8.9	3.2	5.7	85	50	35	7.87	3.59	3.71	0.46	0.09	0.02
303	T T	G G	C C	male	45	103	48	10.9	3.0	7.9	82	48	34	6.92	3.66	2.79	0.37	0.08	0.02
313	T T	A G	C T	male	28	24	38	8.6	2.5	6.1	77	48	29	6.62	2.77	2.93	0.39	0.48	0.05
347	T T	G G	C T	male	31	17	12	9.0	2.9	6.1	68	48	20	5.88	3.52	1.64	0.39	0.31	0.02
352	A T	G G	C C	male	30	28	48	8.6	2.1	6.5	79	47	32	7.98	4.64	2.49	0.65	0.17	0.03
383	A T	G G	C C	female	30	13	8	7.6	2.1	5.5	70	44	26	5.99	3.29	2.27	0.31	0.09	0.03
385	T T	G G	C C	male	49	22	23	8.1	2.9	5.2	75	46	29	6.35	4.20	1.76	0.31	0.06	0.02
386	T T	G G	C T	male	41	28	43	16.0	4.1	11.9	77	46	31	4.95	2.48	1.99	0.38	0.07	0.03
387	T T	G G	C C	male	40		19	10.9	3.1	7.8	84	47	37	9.00	3.68	4.50	0.61	0.17	0.04
388	T T	G G	C C	female	39		11	11.5	3.7	7.8	74	45	29	5.79	3.19	2.08	0.41	0.08	0.03
390	T T	G G	C C	female	30		13	6.1	1.6	4.5	83	49	34	6.18	3.79	1.80	0.29	0.27	0.03
392	T T	G G	C C	male	49		95	10.8	3.3	7.5	77	47	30	9.03	4.71	3.70	0.52	0.07	0.03
393	T T	G G	C C	female	43		12	6.8	1.7	5.1	78	48	30	5.96	3.03	2.23	0.52	0.13	0.05
394	T T	G G	C C	female	43		19	6.3	1.7	4.6	79	49	30	6.58	3.37	2.80	0.29	0.11	0.01
395	T T	G G	C C	male	50		48	8.7	3.6	5.1	81	44	37	10.48	6.51	3.07	0.70	0.17	0.03
396	T T	G G	C C	male	39		50	14.1	3.9	10.2	79	48	31	6.35	3.28	2.56	0.35	0.15	0.01
397	T T	G G	C C	male	31		17	39.8	9.7	30.1	80	50	30	6.84	3.75	2.62	0.37	0.07	0.03
398	T T	G G	C T	male	38		18	27.8	5.9	21.9	69	44	25	6.96	4.57	1.62	0.55	0.19	0.03
403	T T	G G	C C	male	37	25	44	8.0	2.6	5.4	83	50	33	5.94	3.65	1.80	0.36	0.12	0.01
404	T T	G G	C C	male	38	28	38	9.6	3.4	6.2	77	47	30	7.20	4.45	2.07	0.44	0.18	0.06
410	T T	G G	C C	male	39	22	35	7.6	2.9	4.7	75	46	29	4.57	2.31	1.76	0.40	0.09	0.01
411	T T	G G	C C	male	34	34	52	10.4	3.5	6.9	79	47	32	9.78	5.71	3.22	0.79	0.04	0.02
412	T T	G G	C C	male	45	43	94	6.8	3.1	3.7	80	44	36	5.07	3.22	1.54	0.24	0.05	0.02
413	T T	G G	C C	male	39	21	24	15.6	3.6	12.0	83	48	35	3.86	1.86	1.61	0.22	0.15	0.02
414	T T	G G	C C	male	40	24	32	21.6	6.6	15.0	77	48	29	10.21	8.00	1.44	0.68	0.08	0.01
415	T T	G G	C C	male	48	22	18	11.7	4.0	7.7	74	47	27	6.63	3.20	2.88	0.44	0.08	0.03
416	T T	G G	C T	female	47	23	23	11.5	2.9	8.6	81	48	33	7.58	4.65	2.38	0.51	0.03	0.01
418	T T	G G	C C	male	31	15	13	12.8	3.4	9.4	78	48	30	5.08	2.26	2.32	0.30	0.16	0.04
420	A T	G G	C C	male	36	14	15	6.7	2.2	4.5	70	45	25	5.89	3.31	2.07	0.32	0.17	0.02
423	T T	G G	C C	male	41	33	39	10.7	4.0	6.7	78	49	29	7.92	6.11	1.31	0.50	0.00	0.00
425	T T	G G	C T	male	32	23	14	14.8	4.5	10.3	83	49	34	7.01	4.39	1.90	0.47	0.23	0.02
428	T T	G G	C T	female	33	21	22	8.3	2.6	5.7	86	50	36	6.42	3.75	2.14	0.48	0.04	0.01
430	A T	G G	C T	female	42	15	11	10.1	2.1	8.0	78	48	30	5.84	3.53	1.95	0.31	0.02	0.03
431	T T	G G	C C	male	36	20	16	10.4	4.0	6.4	80	51	29	9.40	7.34	1.42	0.56	0.05	0.03
433	T T	G G	C C	male	42	12	16	7.3	2.1	5.2	77	47	30	8.16	4.46	2.96	0.53	0.20	0.01
436	T T	G G	C C	male	41	21	21	10.0	3.8	6.2	76	50	26	5.50	3.45	1.67	0.29	0.04	0.05
440	T T	G G	C C	male	32	19	14	14.5	3.5	11.0	74	48	26	4.17	2.31	1.37	0.27	0.18	0.04
442	T T	G G	C C	male	35	26	39	8.2	2.3	5.9	85	49	36	7.28	3.51	3.04	0.40	0.19	0.14
443	T T	G G	C T	male	41	24	52	6.9	2.6	4.3	72	45	27	6.00	3.11	2.27	0.43	0.15	0.04
444	T T	G G	C C	male	45	31	42	14.8	3.6	11.2	88	52	36	6.59	3.94	2.03	0.33	0.27	0.02
445	T T	A G	C T	female	36	17	10	12.4	3.3	9.1	76	43	33	8.66	5.98	2.19	0.46	0.02	0.01
446	T T	G G	C C	female	31	19	15	12.0	3.6	8.4	78	48	30	6.85	4.30	1.87	0.47	0.18	0.03
449	T T	G G	C C	female	36	19	16	6.7	2.3	4.4	81	46	35	6.29	3.66	3.21	0.25	0.15	0.02
453	T T	G G	C C	male	48	23	27	14.3	4.5	9.8	76	49	27	4.99	2.54	2.09	0.25	0.07	0.04
454	T T	G G	C C	male	30	26	10	6.3	2.3	4.0	79	49	30	3.39	1.51	1.45	0.38	0.04	0.01
455	T T	G G	C C	male	30	19	27	8.4	2.9	5.5	77	47	30	8.02	2.99	4.46	0.46	0.07	0.04
456	T T	G G	C C	male	32	39	98	9.6	2.9	6.7	80	49	31	8.10	4.06	3.15	0.64	0.15	0.10
457	A T	G G	C C	male	43	29	52	13.2	4.8	8.4	78	46	32	4.43	1.90	1.93	0.45	0.13	0.02
458	T T	G G	C C	female	42	18	17	12.1	3.5	8.6	75	46	29	4.04	2.35	1.42	0.21	0.03	0.03
466	T T	G G	C C	male	30	26	36	11.6	3.6	8.0	79	49	60	7.93	5.03	2.32	0.52	0.03	0.03
467	T T	G G	C C	male	35	26	60	11.0	3.7	7.3	81	50	31	7.49	4.53	2.28	0.52	0.10	0.06
470	T T	G G	C C	male	33	21	24	17.7	5.2	12.5	84	49	35	8.36	5.09	2.58	0.53	0.10	0.06
471	T T	G G	C C	male	32	16	25	7.0	2.2	4.8	77	47	30	9.04	5.11	3.18	0.45	0.20	0.04
472	T T	G G	C C	male	43	22	32	26.6	5.8	20.8	82	52	30	5.98	3.02	2.38	0.32	0.23	0.03
473	T T	G G	C C	female	31	15	10	14.6	4.0	10.6	79	49	30	8.65	5.80	2.11	0.62	0.10	0.02
474	T T	G G	C C	male	39	23	30	9.5	3.3	6.2	95	51	44	5.90	2.76	2.71	0.33	0.09	0.01
475	A T	G G	C C	male	32	27	43	15.7	3.9	11.8	86	49	37	9.23	5.04	3.48	0.55	0.12	0.04
478	T T	G G	C C	male	34	19	14	13.6	3.9	9.7	78	48	30	6.33	4.00	1.79	0.37	0.15	0.02
479	A T	G G	C C	female	38	26	15	22.3	4.2	18.1	84	47	37	7.85	4.91	2.33	0.43	0.15	0.03
480	T T	G G	C C	male	34	24	16	11.9	3.0	8.9	80	47	33	7.03	4.51	1.92	0.38	0.18	0.04
484	T T	G G	C C	male	41	24	19	13.7	4.2	9.5	74	48	26	7.83	4.41	2.49	0.68	0.20	0.02
487	T T	G G	C C	male	32	20	20	10.1	3.0	7.1	78	49	29	9.05	5.70	2.22	0.62	0.48	0.03
488	T T	G G	C C	male	35	23	33	14.4	3.8	10.6	80	48	30	5.51	3.37	1.63	0.41	0.07	0.03
489	T T	G G	C C	male	38	19	34	12.6	4.4	8.2	78	48	30	6.99	2.79	3.41	0.60	0.14	0.05
491	T T	G G	C C	male	30	30	34	11.6	2.6	9.0	88	51	37	5.60	2.35	2.91	0.26	0.06	0.02
495	T T	G G	C C	male	31	25	26	11.4	3.0	8.4	78	48	30	7.86	5.39	1.92	0.45	0.08	0.02
498	T T	G G	C C	male	42	23	21	11.4	3.2	8.2	79	47	32	6.46	3.64	2.29	0.43	0.08	0.02
499	A T	G G	C C	female	32	14	10	21.4	6.2	15.2	76	48	28	7.27	4.18	2.39	0.32	0.31	0.07
501	T T	G G	C C	male	38	27	26	9.0	4.0	5.0	87	50	37	8.58	5.26	2.55	0.52	0.20	0.05
502	T T	G G	C C	male	50	30	51	24.0	7.3	16.7	79	48	31	5.99	3.36	1.92	0.56	0.12	0.03
504	T T	G G	C C	male	34	37	98	11.4	2.9	8.5	87	48	39	7.60	4.14	2.56	0.75	0.11	0.04
506	A T	G G	C C	male	32	16	19	12.2	4.0	8.2	71	46	25	5.21	2.88	1.94	0.34	0.04	0.01
509	T T	A G	C T	male	30	22	17	9.9	3.4	6.5	77	48	29	6.56	4.14	1.96	0.32	0.12	0.02
510	T T	A G	C T	male	39	25	35	10.2	2.5	7.7	79	47	32	5.62	3.36	1.76	0.41	0.06	0.03
511	T T	G G	C C	female	49	55	54	13.6	4.5	9.1	74	46	28	4.95	2.37	2.19	0.29	0.07	0.03
512	T T	G G	C C	female	41	22	17	9.5	3.6	5.9	82	44	38	5.04	3.05	1.35	0.60	0.02	0.02
513	A T	A G	C T	female	44	21	14	7.6	1.7	5.9	79	48	31	6.50	4.24	1.60	0.44	0.17	0.05
516	T T	G G	C C	female	48	17	11	4.9	1.1	3.8	78	44	34	5.85	4.06	1.32	0.36	0.09	0.02
517	T T	G G	C C	male	46	33	52	11.4	3.2	8.2	74	50	24	5.54	3.02	2.07	0.22	0.17	0.06
521	T T	G G	C C	male	34	15	16	19.1	7.3	11.8	82	48	34	6.11	3.05	2.44	0.46	0.13	0.03
522	T T	G G	C C	male	41	18	18	12.8	3.7	9.1	78	48	30	8.12	5.66	1.86	0.48	0.10	0.02
523	T T	G G	C C	female	45	55	90	13.1	4.3	8.8	83	46	37	7.01	4.01	2.36	0.48	0.13	0.03
525	T T	G G	C C	male	30	103	108	10.6	6.2	4.4	81	52	29	6.87	4.00	2.16	0.49	0.19	0.03
527	A T	G G	C C	male	34	21	35	12.0	3.4	8.6	80	49	31	8.18	4.48	3.04	0.49	0.14	0.03
528	T T	G G	T T	female	36	26	28	11.8	2.5	9.3	83	47	39	7.98	4.78	2.52	0.52	0.12	0.04
529	T T	G G	C T	male	43	22	18	16.3	5.0	11.3	78	48	30	5.22	3.23	1.77	0.17	0.04	0.11
530	A T	G G	C C	male	47	41	41	7.7	2.0	5.7	79	48	31	6.79	3.56	2.61	0.42	0.15	0.05
533	T T	G G	C T	female	42	21	17	8.9	2.4	6.5	77	47	30	4.91	3.60	0.95	0.18	0.16	0.02
534	T T	G G	C C	male	42	40	83	10.1	2.9	7.2	77	49	28	5.27	2.75	1.92	0.38	0.18	0.04
536	T T	G G	C C	male	37	81	151	13.0	4.4	8.6	75	47	28	3.81	1.69	1.60	0.33	0.12	0.07
537	T T	G G	C C	male	50	21	18	11.5	3.5	8.0	78	48	30	5.90	2.71	2.78	0.28	0.11	0.02
538	T T	G G	C C	male	35	57	120	20.6	5.0	15.6	88	50	38	9.68	4.64	4.12	0.65	0.22	0.05
543	T T	G G	C C	male	38	20	15	20.6	15.1	5.5	98	53	45	6.37	4.13	1.56	0.56	0.09	0.03
545	T T	G G	C C	male	40	25	29	16.2	3.8	12.4	78	49	29	6.22	3.40	2.35	0.41	0.04	0.02
548	T T	G G	C C	male	34	20	35	15.2	4.1	11.1	80	50	30	6.78	4.14	2.09	0.39	0.13	0.03
549	A T	G G	C T	male	32	26	36	7.0	1.7	5.3	84	49	35	8.05	4.96	2.34	0.46	0.24	0.05
552	T T	G G	C C	male	42	18	12	12.1	3.4	8.7	72	45	27	5.56	2.38	2.59	0.42	0.14	0.03
553	T T	G G	C C	male	30	29	23	23.6	6.7	16.9	84	51	33	4.26	1.96	2.00	0.21	0.08	0.01
554	T T	G G	C C	male	48	32	52	26.2	6.0	20.2	78	50	28	7.94	4.14	2.91	0.62	0.21	0.06
557	T T	G G	C C	female	43	18	14	8.6	2.4	6.2	74	48	26	6.42	3.63	2.51	0.22	0.04	0.02
558	A T	G G	C T	female	38	20	12	10.8	2.1	8.7	80	45	35	7.94	4.77	2.54	0.50	0.06	0.07
560	T T	G G	C C	female	38	20	15	6.8	1.5	5.3	75	45	30	7.81	4.29	3.09	0.31	0.10	0.02
561	T T	G G	C C	male	41	26	47	14.0	3.5	10.5	82	50	32	5.67	3.10	1.90	0.38	0.23	0.06
563	T T	G G	C C	female	43	16	13	13.5	3.8	9.7	84	45	39	6.64	4.24	1.89	0.36	0.10	0.05
564	T T	G G	C C	female	45	16	15	5.3	1.3	4.0	81	45	36	6.50	3.78	2.11	0.36	0.22	0.03
565	T T	G G	C C	female	30	17	12	11.6	2.9	8.7	74	46	28	5.85	3.65	1.79	0.29	0.10	0.02
567	T T	G G	C C	male	39	37	62	12.6	4.0	8.6	76	47	29	7.89	3.97	3.31	0.48	0.11	0.02
568	T T	G G	C C	male	32	21	34	15.4	4.8	10.6	80	49	31	8.44	4.61	3.17	0.45	0.17	0.04
570	T T	G G	C C	male	32	16	19	8.9	3.2	5.7	75	48	27	8.34	4.93	3.69	0.62	0.08	0.02
572	T T	G G	C C	female	49	19	11	9.0	2.3	6.7	79	45	34	3.97	1.99	1.69	0.20	0.07	0.02
573	T T	G G	C C	male	40	20	36	11.6	3.4	8.2	74	46	28	8.65	4.91	2.80	0.66	0.24	0.04
576	A T	G G	C C	female	64	18	20	9.9	2.6	7.3	81	45	36	5.91	3.50	2.00	0.34	0.06	0.01
577	T T	G G	C C	male	25	16	16	13.2	4.6	8.6	80	52	28	5.73	3.51	1.62	0.39	0.19	0.02
578	T T	G G	C C	male	24	18	16	10.1	2.9	7.2	80	50	30	8.60	5.40	2.46	0.63	0.09	0.02
579	T T	G G	T T	female	31	14	13	10.2	3.1	7.1	79	49	30	8.56	5.31	2.63	0.47	0.13	0.02
580	T T	G G	C T	female	26	34	41	7.9	2.3	5.6	82	50	32	4.31	1.94	1.77	0.29	0.26	0.05
583	T T	A G	C T	male	34	15	11	13.1	4.7	8.4	72	45	27	6.96	3.59	2.62	0.41	0.27	0.07
584	T T	G G	C C	female	25	19	14	24.8	8.9	15.9	78	48	30	49.6	2.43	2.14	0.27	0.11	0.01
585	T T	G G	C C	female	23	17	11	22.0	6.6	15.4	75	45	30	5.95	3.90	1.59	0.29	0.14	0.03
588	T T	G G	C C	female	41	17	14	10.8	2.8	8.0	81	46	35	6.30	4.56	1.31	0.33	0.06	0.04
594	T T	G G	C C	male	40	24	45	7.7	2.0	5.7	77	48	29	8.30	1.15	3.51	0.50	0.10	0.04
597	T T	G G	C C	female	40	24	47	6.3	2.2	4.1	84	48	36	7.13	4.04	2.61	0.33	0.14	0.01
600	T T	G G	C C	male	32	19	23	3.8	1.4	2.4	83	46	37	7.44	4.54	2.32	0.41	0.15	0.02
605	T T	A G	C C	female	51	13	12	12.5	3.6	8.9	76	47	29	4.86	2.54	2.00	0.24	0.07	0.01
606	T T	G G	C T	male	45	26	24	9.2	1.5	7.7	94	54	40	4.17	2.40	1.49	0.19	0.07	0.02
607	T T	G G	C C	male	44	18	48	10.1	3.3	6.8	78	48	30	10.93	6.34	3.76	0.67	0.09	0.07
608	T T	G G	C C	male	49	16	12	7.2	2.0	5.2	88	46	42	4.28	3.05	0.73	0.36	0.12	0.02
609	T T	G G	C C	male	26	19	15	5.5	2.2	3.3	80	47	33	9.90	6.63	2.43	0.69	0.11	0.04
611	T T	G G	C C	male	50	27	34	13.8	4.1	9.7	78	47	31	6.16	3.09	2.51	0.31	0.21	0.04
612	T T	G G	C C	female	50	23	15	10.1	2.7	7.4	84	48	36	4.44	2.21	1.74	0.32	0.10	0.07
613	T T	G G	C C	male	43	21	24	11.1	3.6	7.5	86	51	35	7.30	3.92	2.91	0.38	0.07	0.02
614	T T	G G	C T	male	23	13	11	12.3	4.1	8.2	76	48	28	6.46	3.58	2.19	0.53	0.13	0.03
615	T T	G G	C C	female	35	18	15	11.3	3.4	7.9	79	49	30	5.73	4.10	1.22	0.35	0.04	0.02
618	A T	G G	C C	male	42	24	21	15.4	3.9	11.5	78	51	27	5.52	3.04	2.06	0.34	0.05	0.03
619	T T	G G	C C	female	35	15	14	10.5	3.6	6.9	77	47	30	5.99	2.73	2.79	0.42	0.04	0.01
621	T T	G G	C C	female	33	17	10	14.7	3.9	10.8	77	48	29	8.59	6.14	1.91	0.47	0.04	0.03
622	T T	G G	C C	female	32	23	18	9.0	3.1	5.9	79	49	30	4.49	2.71	1.42	0.28	0.06	0.02
623	A T	G G	C T	male	55	24	24	13.1	3.0	10.1	75	45	30	8.36	5.09	2.45	0.35	0.45	0.02
624	T T	G G	C C	male	30	42	95	14.9	4.1	10.8	80	50	30	7.27	3.21	3.30	0.52	0.20	0.04
625	T T	G G	C C	female	40	23	15	10.1	2.4	7.7	78	48	30	7.33	3.67	3.04	0.32	0.25	0.05
626	T T	G G	C C	male	24	17	16	13.1	4.1	9.0	78	51	27	6.47	3.51	2.37	0.50	0.07	0.02
627	T T	G G	C T	female	46	26	38	12.0	2.6	9.4	83	47	36	8.87	7.51	1.15	0.21	0.00	0.00
628	T T	G G	C C	male	25	48	82	21.3	6.4	14.9	81	50	31	7.05	4.52	1.72	0.54	0.24	0.03
629	T T	G G	C C	female	25	24	13	13.2	4.2	9.0	84	50	34	9.61	5.80	3.18	0.47	0.14	0.02
630	A T	G G	C C	female	27	16	10	11.0	3.4	7.6	78	48	30	5.68	2.71	2.28	0.33	0.32	0.04
633	T T	G G	C T	male	53	18	18	10.7	3.9	6.8	78	48	30	7.19	3.86	2.14	0.47	0.58	0.14
637	T T	G G	C C	male	52	20	19	13.6	3.4	10.2	72	45	27	4.16	2.02	1.64	0.29	0.17	0.04
638	T T	G G	C C	female	39	17	26	9.0	2.4	6.6	79	48	31	6.44	3.75	1.79	0.24	0.62	0.04
639	T T	G G	C C	male	39	35	74	13.5	3.6	9.9	82	51	31	7.18	3.97	2.60	0.32	0.26	0.03
641	T T	G G	C C	male	32	16	17	14.7	3.6	11.1	76	48	28	8.78	5.52	2.48	0.38	0.33	0.07
642	T T	G G	C C	female	38	18	10	9.1	2.3	6.8	77	47	30	5.53	3.03	1.91	0.44	0.09	0.06
643	T T	G G	C C	female	43	18	24	8.6	2.0	6.6	83	51	32	6.80	3.85	2.51	0.37	0.05	0.02
644	T T	G G	C C	male	31	34	64	23.2	6.1	17.1	81	51	30	9.26	5.77	2.70	0.57	0.15	0.07
645	T T	G G	C C	female	62	24	18	8.2	1.7	6.5	82	48	34	7.43	4.20	2.60	0.29	0.29	0.05
647	T T	G G	C C	male	34	33	33	12.5	3.2	9.3	79	49	30	7.76	4.87	2.31	0.50	0.04	0.04
648	T T	G G	C C	male	42	33	38	11.5	3.4	8.1	79	49	30	6.46	4.30	1.72	0.30	0.10	0.04
651	T T	G G	C C	female	37	17	12	11.5	3.3	8.2	73	45	28	7.79	5.31	2.16	0.28	0.02	0.02
652	T T	G G	C T	female	62	37	39	16.2	5.3	10.9	83	47	36	6.38	2.86	2.86	0.33	0.30	0.03
653	T T	G G	C C	male	34	26	49	17.7	4.9	12.8	82	49	33	6.76	3.42	2.63	0.38	0.30	0.03
654	T T	G G	C C	female	50	18	14	12.5	3.1	9.4	81	48	33	7.06	3.90	2.78	0.31	0.04	0.03
655	T T	G G	C C	male	45	23	40	10.7	2.6	8.1	80	45	35	7.49	4.08	2.72	0.28	0.35	0.06
657	T T	G G	C C	female	24	15	11	14.6	4.4	10.2	77	47	30	6.14	2.73	2.69	0.60	0.09	0.03
658	T T	G G	C T	female	21	15	10	8.6	2.8	5.8	73	45	28	7.20	4.56	2.07	0.45	0.11	0.01
659	T T	G G	C C	male	32	23	17	17.9	5.7	12.2	78	48	30	6.62	3.59	2.19	0.66	0.12	0.06
660	A T	G G	C C	female	30	19	12	17.7	5.0	12.7	77	47	30	6.96	2.75	3.36	0.64	0.20	0.01
663	T T	A G	C T	female	38	18	14	9.7	3.8	5.9	78	48	30	5.84	4.01	1.37	0.38	0.07	0.01
664	T T	G G	C C	female	46	24	32	11.0	2.8	8.2	76	46	30	7.87	5.00	2.26	0.49	0.09	0.03
665	T T	G G	C C	female	41	18	15	5.3	1.4	3.9	81	45	36	5.56	2.93	2.34	0.19	0.07	0.03
667	T T	G G	C C	female	42	17	17	7.7	2.2	5.5	80	45	35	5.49	2.87	2.17	0.33	0.10	0.02
668	T T	G G	C C	female	43	19	14	5.9	1.2	4.7	76	47	29	6.40	2.63	3.32	0.33	0.09	0.03
669	T T	G G	C C	male	42	25	28	10.3	3.0	7.3	80	45	35	8.27	4.19	2.77	0.74	0.55	0.02
670	T T	G G	C C	female	63	22	17	13.6	4.0	9.6	77	47	30	3.90	2.28	1.33	0.23	0.05	0.01
671	A T	G G	C C	male	45	25	21	13.1	3.5	9.6	75	46	29	7.40	3.14	3.78	0.31	0.13	0.04
672	A T	G G	C C	male	20	23	26	15.5	4.6	10.9	75	47	28	7.25	4.20	2.50	0.42	0.10	0.03
673	T T	G G	C C	male	58	22	21	16.5	3.6	12.9	83	50	33	9.34	5.58	2.59	0.63	0.38	0.16
675	T T	G G	C C	male	43	36	91	18.3	4.5	13.8	78	47	30	5.74	3.14	2.01	0.48	0.08	0.03
676	T T	G G	C C	male	59	25	37	9.6	2.8	6.8	75	47	28	7.71	4.03	2.92	0.34	0.35	0.07
677	T T	G G	C C	female	27	16	15	9.0	3.4	5.6	76	47	29	11.64	7.44	3.33	0.55	0.30	0.02
678	T T	G G	C C	female	36	20	19	8.7	2.7	6.0	84	51	33	8.33	4.86	2.78	0.55	0.12	0.02
679	T T	G G	C T	male	42	35	42	8.3	2.4	5.9	78	48	30	6.97	3.88	2.53	0.47	0.06	0.03
680	T T	A G	C T	male	35	22	28	16.7	4.4	12.3	81	48	33	5.69	3.24	1.84	0.39	0.19	0.03
681	T T	G G	C T	male	30	21	21	15.1	5.2	9.9	80	53	27	5.84	3.258	2.06	0.30	0.16	0.04
682	T T	G G	C C	male	35	18	11	10.0	3.6	6.4	78	49	29	5.37	3.11	1.61	0.50	0.14	0.01
683	T T	G G	C C	male	38	22	22	10.4	2.9	7.5	82	50	32	6.34	3.01	2.58	0.53	0.20	0.02
684	T T	G G	C C	male	44	32	54	7.4	2.3	5.1	79	48	31	8.06	4.45	2.99	0.41	0.17	0.04
685	A T	A G	C T	female	36	18	15	8.6	2.3	6.3	77	47	30	4.65	2.51	1.54	0.47	0.12	0.01
686	T T	A A	C T	male	37	23	39	13.5	3.5	10.0	78	48	30	6.89	3.80	2.54	0.42	0.10	0.03
688	T T	A G	C T	female	40	14	17	8.6	2.0	6.6	74	47	27	6.26	3.18	2.36	0.53	0.16	0.03
689	A T	G G	C T	male	23	30	54	10.6	4.4	6.2	78	50	28	6.20	3.80	1.75	0.41	0.19	0.05
699	T T	G G	C T	male	45	24	19	11.2	3.0	8.2	75	47	28	7.38	4.25	2.66	0.31	0.14	0.02
700	T T	G G	C C	male	32	24	28	10.5	3.5	7.0	78	48	30	6.19	3.75	1.95	0.39	0.06	0.04
701	T T	G G	C C	male	45	19	9	9.1	3.1	6.0	72	47	25	4.86	2.67	1.72	0.27	0.19	0.01
703	A T	G G	C C	male	42	22	18	18.4	5.3	13.1	79	50	29	4.11	2.22	1.48	0.35	0.04	0.02
707	A T	G G	C C	female	32	18	10	13.0	4.2	8.8	77	47	30	5.16	3.36	1.44	0.26	0.07	0.03
709	T T	G G	C C	male	31	23	35	13.5	3.0	10.5	81	48	33	6.28	2.97	2.73	0.47	0.09	0.02
712	T T	G G	C C	female	31	59	116	10.3	2.4	7.9	82	49	33	7.01	3.64	2.83	0.40	0.12	0.02
729	T T	G G	C C	male	36	22	36	14.6	3.6	11.0	81	49	32	8.53	4.24	3.60	0.43	0.22	0.04
739	T T	G G	C C	female	31	17	24	10.4	3.6	6.8	81	47	34	7.98	4.77	2.62	0.45	0.12	0.02
740	A T	G G	C T	male	38	17	23	11.1	2.6	8.5	84	47	37	9.45	6.77	1.80	0.72	0.13	0.03
746	T T	G G	C C	male	48	33	54	12.7	3.7	9.0	76	48	28	4.59	1.94	2.11	0.32	0.19	0.03
751	A T	G G	C C	male	39	24	26	8.6	2.4	6.2	85	50	35	6.76	3.11	2.95	0.55	0.12	0.03
754	T T	A G	C T	female	33	17	14	7.2	2.3	4.9	80	45	35	6.49	3.79	1.97	0.42	0.27	0.04
755	T T	A G	C T	male	35	26	28	10.1	2.5	6.1	83	49	34	10.30	6.96	2.94	0.58	0.08	0.04
758	T T	G G	C C	male	30	27	36	13.2	4.5	8.7	79	51	28	4.92	2.29	1.90	0.59	0.12	0.02
762	T T	G G	C C	female	40	42	60	14.9	4.0	10.9	76	46	30	6.38	4.19	1.58	0.46	0.14	0.01
764	T T	G G	C C	male	34	22	23	8.5	2.8	5.7	77	48	29	3.66	1.94	1.50	0.18	0.03	0.01
769	T T	G G	C C	female	35	17	116	8.3	2.2	6.1	76	47	29	5.65	3.50	1.77	0.28	0.04	0.06
770	T T	G G	C T	female	46	25	22	10.5	2.1	8.4	79	45	34	5.21	3.33	1.50	0.26	0.09	0.03
772	T T	G G	C C	male	41	19	23	11.5	3.5	8.0	81	47	34	4.92	2.24	2.08	0.46	0.09	0.05
801	T T	G G	C C	male	38	25	31	13.5	3.5	10.0	83	48	35	7.00	3.31	3.18	0.45	0.04	0.02
802	A T	G G	C C	male	42	27	60	38.9	12.1	26.8	74	45	29	7.08	4.53	1.66	0.76	0.10	0.03
804	T T	G G	C C	male	40	30	35	12.2	3.7	8.5	80	49	31	7.60	4.19	2.62	0.70	0.08	0.01
805	A T	A G	C T	male	44	22	37	11.4	3.0	8.4	82	51	31	8.60	4.91	2.91	0.63	0.11	0.04
807	T T	G G	C C	female	50	54	44	11.2	3.2	8.0	83	44	39	7.98	4.74	2.41	0.46	0.32	0.05
808	T T	G G	C C	female	43	20	22	10.7	2.7	8.0	77	47	30	7.38	4.37	2.44	0.36	0.18	0.03
810	T T	G G	C T	female	47	19	21	14.4	4.0	10.4	82	47	35	8.51	6.22	1.70	0.47	0.09	0.03
811	T T	G G	C C	male	50	26	49	12.2	3.3	8.9	81	47	34	4.13	2.24	1.46	0.31	0.09	0.03
812	T T	G G	C C	male	36	20	34	9.9	3.3	6.6	79	48	31	8.78	5.21	2.94	0.54	0.06	0.03
813	T T	G G	C C	female	35	17	16	18.5	6.1	12.4	75	49	26	5.90	3.85	1.54	0.41	0.09	0.01
816	T T	G G	C T	male	39	19	20	12.3	3.7	8.6	79	49	30	6.57	3.62	2.33	0.30	0.28	0.04
818	A T	G G	C C	female	32	15	14	13.9	4.5	9.4	78	49	29	6.13	3.35	2.27	0.42	0.08	0.01
819	T T	G G	C T	female	46	25	19	4.0	1.1	2.9	78	48	30	5.09	2.39	2.28	0.25	0.16	0.01
820	T T	G G	C C	female	45	16	14	11.7	2.7	9.0	82	49	33	7.47	5.37	1.55	0.38	0.12	0.05
822	T T	G G	C C	male	33	55	88	16.9	4.3	12.6	82	49	33	8.04	4.78	2.43	0.65	0.16	0.02
824	T T	G G	C C	female	33	38	60	12.9	3.5	9.4	85	48	37	7.33	4.78	2.06	0.31	0.14	0.04
826	T T	G G	C C	male	38	27	25	18.4	5.1	13.3	80	52	28	、4.61	2.35	1.94	0.26	0.07	0.02
827	T T	G G	T T	male	31	31	38	8.5	2.5	6.0	79	50	29	7.49	4.52	2.33	0.41	0.19	0.04
828	T T	G G	C C	male	48	23	21	32.0	8.8	23.2	81	48	33	5.93	3.43	2.05	0.34	0.08	0.03
829	T T	G G	C C	female	48	31	41	7.7	2.2	5.5	81	46	35	6.08	3.77	1.46	0.77	0.06	0.02
832	T T	G G	C C	male	32	24	31	9.5	2.7	6.8	80	48	32	5.98	3.51	2.03	0.31	0.09	0.04
833	T T	G G	C T	female	39	77	96	13.0	3.6	9.4	80	45	35	9.37	5.83	2.64	0.58	0.26	0.06
834	A T	G G	C C	female	37	25	22	5.8	1.6	4.2	79	49	30	8.88	5.24	3.13	0.35	0.11	0.05
835	T T	G G	C C	female	33	15	10	16.9	4.4	12.5	74	46	28	3.85	1.92	1.48	0.34	0.07	0.04
837	T T	G G	C C	male	38	26	69	15.9	4.2	11.7	77	48	29	7.38	4.29	2.45	0.55	0.07	0.02
838	A A	G G	C C	female	30	16	8	10.7	4.0	6.7	82	48	34	5.13	2.65	2.07	0.36	0.03	0.02
839	T T	G G	C C	male	49	59	46	9.8	6.0	3.8	79	44	35	7.23	3.16	3.33	0.67	0.03	0.04
843	T T	G G	C C	male	30	31	27	7.4	2.3	5.1	84	50	34	7.20	1.14	2.47	0.40	0.16	0.03
847	A T	G G	C C	male	30	34	53	9.8	2.8	7.0	80	50	30	6.80	3.69	2.52	0.49	0.09	0.01
849	T T	A G	C T	female	35	17	15	7.9	2.5	5.4	78	49	29	10.16	6.95	2.25	0.50	0.40	0.06
850	T T	G G	C C	male	41	22	49	20.3	4.9	15.4	85	49	36	6.27	2.90	2.83	0.42	0.11	0.01
852	T T	G G	C C	male	40	32	49	10.5	5.3	5.2	82	48	34	7.57	4.46	2.35	0.47	0.16	0.13
853	T T	G G	C T	female	40	21	22	10.6	2.8	7.8	73	44	29	5.06	2.82	1.76	0.32	0.12	0.04
854	T T	G G	C T	female	49	16	16	8.3	2.2	6.1	77	48	29	4.92	3.13	1.39	0.28	0.10	0.02
855	T T	G G	C C	female	30	20	14	17.3	5.4	11.9	76	46	30	5.08	2.94	1.77	0.26	0.09	0.02
857	T T	G G	C C	female	47	16	14	10.7	2.4	8.3	84	50	34	7.97	5.37	1.96	0.45	0.12	0.07
858	A A	G G	C C	female	37	25	25	8.9	2.9	6.0	82	48	34	5.54	3.04	1.81	0.37	0.30	0.02
859	A T	G G	C C	male	31	26	33	9.4	2.5	6.9	77	48	29	10.16	6.43	3.24	0.41	0.06	0.02
